# Ciliary Generation of a Peptidergic Sexual Signal

Raj Luxmi<sup>1</sup>, Richard E. Mains<sup>2</sup>, Betty A. Eipper<sup>1,2\*</sup> and Stephen M. King<sup>1\*</sup>

From the <sup>1</sup>Department of Molecular Biology and Biophysics, and <sup>2</sup>Department of Neuroscience, University of Connecticut Health Center, 263 Farmington Avenue, Farmington, Connecticut 06030-3305, USA.

\* Address correspondence to BAE ([eipper@uchc.edu](mailto:eipper@uchc.edu)) or SMK ([king@uchc.edu](mailto:king@uchc.edu))

**ORCID Numbers:** 0000-0003-1554-0723 (RL), 0000-0003-1154-1331 (REM), 0000-0003-1171-5557 (BAE), 0000-0002-5484-5530 (SMK)

**Running Title:** Peptidergic signaling through cilia

**Key Words:** Amidation / *Chlamydomonas* / Cilia / Chemotaxis / Peptidergic signaling

## Abstract

Peptidergic intercellular communication occurs throughout the eukaryotes, and regulates a wide range of physiological and behavioral responses. Cilia are sensory and secretory organelles that both receive information from the environment and transmit signals. Cilia derived vesicles (ectosomes), formed by outward budding of the ciliary membrane, carry enzymes and other bioactive products; this process represents an ancient mode of regulated secretion. Our previous study revealed the presence of the peptide amidating enzyme, peptidylglycine  $\alpha$ -amidating monooxygenase (PAM), in cilia and its key role in ciliogenesis. Furthermore, PAM and its amidated products are released in ciliary ectosomes from the green alga *Chlamydomonas reinhardtii*. One amidated product (GATI-*amide*) serves as a chemotactic modulator for *C. reinhardtii* gametes, attracting *minus* gametes while repelling *plus* gametes. Here we dissect the complex processing pathway that leads to formation of this amidated peptidergic sexual signal specifically on the ectosomes of *plus* gametes. We also identify a potential prohormone convertase that undergoes domain rearrangement during ectosomal secretion as a substrate for PAM. Analysis of this pathway affords insight into how single-celled organisms lacking dense core vesicles engage in regulated secretion, and provides a paradigm for understanding how amidated peptides that transmit sexual and other signals through cilia are generated.

## Introduction

Cilia are membrane-delimited, microtubule-based cell extensions that protrude into the extracellular space and function as key motile, sensory and secretory organelles in many eukaryotes (Marshall and Basto, 2017). These complex organelles that were present in the last eukaryotic common ancestor both receive and transmit signals (Carvalho-Santos et al., 2011; Malicki and Johnson, 2017). Proteins encoded by approximately 5% of the human genome contribute to their assembly, structure and function (van Dam et al., 2019). Mutations in many of these genes cause ciliopathies, with phenotypes ranging from neurological malformations, skeletal abnormalities and kidney disease to obesity and insulin resistance (Reiter and Leroux, 2017). The ciliary localization of receptors for peptides such as Wnt, Hedgehog, insulin, somatostatin and  $\alpha$ -melanocyte stimulating hormone ( $\alpha$ MSH) plays an essential role in their signaling ability (Anvarian et al., 2019; Green et al., 2016; Wang et al., 2021).

37 The biosynthesis of signaling peptides involves a well-described sequence of post-translational  
38 modifications and proteolytic cleavages that occur as the preproteins transit from their site of  
39 synthesis in the lumen of the endoplasmic reticulum (ER) to the Golgi complex, and are packaged for  
40 secretion. Post-translational modifications including disulfide bond formation, N- and O-glycosylation,  
41 lipidation, endo- and exo-proteolysis are often required and must occur before secretion (Matsubayashi,  
42 2011; Yasuda et al., 2013). Peptidylglycine  $\alpha$ -amidating monooxygenase (PAM), an ancient copper-  
43 dependent monooxygenase, catalyzes the final step in the biosynthesis of a broad array of peptides such  
44 as mammalian  $\alpha$ MSH and vasopressin, the sea urchin sperm attractant resact, as well as numerous  
45 invertebrate venom peptide toxins. Amidation occurs *via* a two-step reaction catalyzed by the sequential  
46 actions of the monooxygenase (peptidylglycine  $\alpha$ -hydroxylating monooxygenase; PHM) and lyase  
47 (peptidyl- $\alpha$ -hydroxyglycine  $\alpha$ -amidating lyase; PAL) catalytic cores of PAM (Luxmi et al., 2021).

48 Studies in *Chlamydomonas reinhardtii*, a chlorophyte green alga, revealed the presence of active PAM in  
49 the ciliary membrane and demonstrated its key role in ciliogenesis. The ciliary localization of PAM is  
50 conserved in mammals, and a role for PAM in ciliary formation and maintenance is observed in mice,  
51 zebrafish and planaria (Kumar et al., 2016a; Kumar, 2017; Kumar et al., 2018). Although the catalytic  
52 activity of PAM plays an essential role supporting ciliogenesis, how an enzyme essential for a final step in  
53 the biosynthesis of secreted peptides contributes to ciliogenesis remains unclear.

54 *C. reinhardtii* has served as a key model organism for dissecting ciliary assembly, function and signaling  
55 (Kumar et al., 2019; Sasso et al., 2018). Although secretory granules that store bioactive peptides in  
56 neurons and endocrine cells are not observed, we searched for evidence that *C. reinhardtii* produces and  
57 secretes amidated peptides. In addition to constitutive secretion of soluble cargo from Golgi-derived  
58 vesicles, the cilia of *C. reinhardtii* shed extracellular vesicles (ectosomes) produced by outward budding  
59 from the ciliary membrane (Cao et al., 2015; Long and Huang, 2020; Wang et al., 2014; Wood et al., 2013).  
60 Ectosomes released from the cilia of vegetative cells are bioactive and contain a subtilisin-like  
61 endoprotease (VLE1) that degrades the mother cell wall (Kubo et al., 2009; Long et al., 2016; Wood et al.,  
62 2013). Under plentiful nutrient conditions, haploid *C. reinhardtii* cells divide by mitosis. Starvation triggers  
63 a genetically encoded developmental process resulting in the formation of sexual gametes of opposite  
64 mating type (termed *minus* and *plus*). Ectosome release increases rapidly when *minus* and *plus* gametes  
65 are mixed (Cao et al., 2015). The interaction of their cilia triggers a complex intraciliary signaling pathway  
66 that leads to loss of gametic cell walls, formation of mating structures, and cell fusion, yielding a  
67 quadriciliate cell that ultimately develops into a diploid zygote. When nutrient conditions improve, the  
68 zygote hatches, releasing haploid meiotic progeny (Harris, 2009).

69 Mass spectrometric analysis of mating ciliary ectosomes led to the identification of an amidated peptide,  
70 derived from Cre03.g204500, that acts as a chemotactic modulator, attracting *minus* gametes while  
71 repelling *plus* gametes (Luxmi et al., 2019). Amidated peptides from echinoderms, *Hydra*, vespids and  
72 humans have also been reported to induce chemotaxis (Palma, 2006; Rowe and Elphick, 2012; Szabó et  
73 al., 2015; Takahashi et al., 1997). Cre03.g204500 encodes a 93-kDa protein with all of the features  
74 expected of a prepeptide (hereafter referred to as preproGATI) (Luxmi et al., 2019). Acting on the  
75 proprotein (proGATI) created by removal of the signal sequence, a carboxypeptidase B-like enzyme could  
76 remove three Arg residues, thus generating a substrate for PAM and production of an amidated C-  
77 terminus ending -Gly-Ala-Thr-Ile-NH<sub>2</sub> (GATI-NH<sub>2</sub>).

78 The *C. reinhardtii* genome encodes many proteins with the characteristics of prepropeptides. Mating  
79 ciliary ectosomes contain proteins derived from several of these prepropeptides, along with the subtilisin-  
80 like enzymes needed for their cleavage, PAM and multiple amidated products (Luxmi et al., 2019). C-  
81 terminal amidation is often required for peptide bioactivity, as it can greatly enhance affinity for the  
82 cognate receptor and confers resistance to proteolytic degradation (Luxmi et al., 2021). Our data suggest  
83 that the mating type-specific production and release of bioactive products in ciliary ectosomes represent  
84 an evolutionarily ancient path to achieving their regulated secretion.

85 Here we define the complex processing and amidation pathway leading to formation of the *C. reinhardtii*  
86 chemotactic sexual signal and determine how it is trafficked through cilia and ultimately released into  
87 ciliary ectosomes and the soluble secretome. We also find that one potential ciliary-localized prohormone  
88 convertase is itself a PAM substrate and undergoes an alteration in domain organization during ciliary  
89 trafficking, coincident with release of the peptidergic sexual signal. Analysis of proGATI, which yields  
90 bioactive products, provides a route to understanding how regulated secretion can occur in a single celled  
91 organism lacking peptide storage vesicles. As PAM, peptide processing enzymes, and cilia are broadly  
92 conserved in eukaryotes, this study provides a paradigm for understanding how amidated products that  
93 transmit chemotactic sexual and other signals through cilia can be generated.

## 94 Results

### 95 Mating ectosomes contain proGATI along with N-terminal and C-terminal fragments of proGATI

96 Tryptic peptides derived from preproGATI, the protein encoded by Cre03.g204500 and consisting of 908  
97 residues, were identified in both mating ectosomes and the soluble secretome (Luxmi et al., 2018; Luxmi  
98 et al., 2019). Interestingly, a proGATI peptide that had been  $\alpha$ -amidated and terminated with the  
99 sequence -Gly-Ala-Thr-Ile-amide (GATI-*amide*) was identified in mating ectosomes (Luxmi et al., 2019) and  
100 in one of six secretome samples analyzed previously (Luxmi et al., 2018). Removal of the N-terminal signal  
101 sequence from preproGATI would yield proGATI, with a calculated molecular mass of 90.6 kDa. The  
102 amidation of proGATI requires the removal of three Arg residues by a carboxypeptidase B-like  
103 exoprotease (Fig. 1A), generating a Gly-extended protein that can serve as a PAM substrate; following  $\alpha$ -  
104 hydroxylation of this Gly residue by PHM, PAL-mediated cleavage produces a protein terminating with a  
105 C-terminal Ile-amide (Fig. 1A).

106 To explore the biosynthesis, post-translational processing, trafficking and secretion of products generated  
107 by the endoproteolytic cleavage of proGATI, we prepared antibodies to a synthetic peptide located near  
108 its N-terminus (N-ter peptide) and to a peptide that included the amidated C-terminus (C-ter peptide) (Fig.  
109 1A). Three rabbits were injected with a mixture of carrier-conjugated synthetic peptides and mating  
110 ectosomes were used to evaluate the sera. Bands of similar apparent molecular mass were visualized in  
111 varying amounts by all three sera; the most prominent appeared at ~250 kDa, ~120 kDa, ~75 kDa and ~63  
112 kDa (Fig. 1B); post-translational modifications such as N-glycosylation and O-glycosylation can have a  
113 dramatic effect on the apparent molecular mass of proteins (Bollig et al., 2007; Voigt et al., 2007).

114 To test whether these bands were specific, sera were pre-incubated with N-ter peptide, amidated-C-ter  
115 peptide or a mixture of both. Pre-incubation with N-ter peptide eliminated the 250-kDa, 120-kDa and 63-  
116 kDa signals. Pre-incubation with the amidated-C-ter peptide eliminated the 250-kDa signal and the 75-

117 kDa signal (Fig. 1B). The ability of both peptides to block the appearance of the 250-kDa band suggests  
118 that it is an extensively modified form of proGATI. The presence of multiple smaller products indicates  
119 that proGATI is subjected to endoproteolytic cleavage.

120 To determine if the signal produced by the C-ter antibody required amidation, serum was pre-incubated  
121 with the amidated C-ter peptide (GATI-NH<sub>2</sub>), the Gly-extended peptide (GATI-Gly) or GATI-OH, which has  
122 a free carboxyl group at its C-terminus (Fig. 1C). For both the 250-kDa proGATI band and the 75-kDa band,  
123 the signal was greatly reduced by pre-incubation with the GATI-NH<sub>2</sub> peptide, partially attenuated by pre-  
124 incubation with the GATI-Gly peptide and unaffected by the GATI-OH peptide. These data indicate that at  
125 least a fraction of the 250-kDa proGATI and 75-kDa product in mating ectosomes is amidated (Fig. 1C).

126 Affinity-purification was used to prepare antibodies that recognized either the N-terminal region or the  
127 amidated C-terminus of proGATI. In agreement with the peptide blocking experiments, affinity-purified  
128 N-ter antibody recognized the 250-kDa, 120-kDa and 63-kDa bands in mating ectosomes while C-ter  
129 antibody affinity-purified using the GATI- NH<sub>2</sub> peptide recognized the 250-kDa and 75-kDa bands (Fig.  
130 S1A). The specificity of the affinity-purified antibodies was quantified using solid phase assays (Figs. S1B  
131 and C).

132 These data suggest that the 250-kDa protein visualized by both antibodies is a heavily modified version of  
133 proGATI, a significant fraction of which is  $\alpha$ -amidated. Endoproteolytic cleavage could generate an  
134 amidated 75-kDa C-ter fragment along with a 120-kDa N-ter fragment. An additional cleavage could yield  
135 a 63-kDa N-ter fragment along with a fragment that would not be recognized by either antibody.

136 **Endoproteolytic cleavage of proGATI generates a heavily glycosylated 75 kDa product that contains the**  
137 **amidated chemomodulatory peptide.**

138 We next used mass spectrometry to identify the proGATI region included in the amidated 75-kDa C-ter  
139 fragment immunoprecipitated from mating ectosomes (Fig. 1D). Analysis of in-gel tryptic digests revealed  
140 its complete C-terminal amidation. The other tryptic peptides identified provided almost complete  
141 (79.7%) coverage of the region from a candidate furin-like cleavage site (R<sup>693</sup>FSR) to Ile<sup>904</sup>-NH<sub>2</sub>, the  
142 amidated C-terminus of the chemomodulatory peptide. The calculated polypeptide mass of this cleavage  
143 product is 23 kDa (Fig. 1E and F).

144 Amongst the post-translational modifications that could generate a 23-kDa C-ter proGATI protein  
145 backbone with an apparent molecular mass of 75 kDa are N- and O-glycosylation. As in all eukaryotes,  
146 N-glycosylation in *C. reinhardtii* involves the assembly of a lipid-linked oligosaccharide that is transferred  
147 to target Asn residues in the lumen of the ER followed by maturation in the Golgi complex (Mathieu-Rivet  
148 et al., 2020). However, lacking several of the enzymes required for the synthesis of a canonical lipid-linked  
149 oligosaccharide, *C. reinhardtii* N-glycans have a unique core structure (Mathieu-Rivet et al., 2020). Two N-  
150 glycosylation sites are predicted in this polypeptide using the NetNGlyc tool (Fig. 1E and F). While most of  
151 the O-glycans identified in mammals are attached to Ser or Thr residues, in *C. reinhardtii* they are more  
152 often attached to hydroxyproline (HyP) residues (Bollig et al., 2007; Joshi et al., 2018; Mathieu-Rivet et  
153 al., 2020); two predicted sites (Pro<sup>728</sup>, Pro<sup>896</sup>) occur in the 23 kDa C-ter proGATI region (Figs. 1E and F, and  
154 S1D).

155 Treatment of mating ectosomes with PNGase F, which removes many mammalian N-linked sugars,  
156 reduced the apparent molecular mass of a small fraction of the 75-kDa product detected by the C-ter  
157 antibody (Fig. S1E); treatment with an O-glycosidase/neuraminidase cocktail was without effect. The  
158 mobility of the 120-kDa proGATI fragment recognized by the N-ter antibody was unaltered by either  
159 treatment (Fig. S1E). The non-canonical lipid-linked oligosaccharide identified in *C. reinhardtii*, along with  
160 its lack of N-acetylglucosaminyltransferase I, which is required for maturation of N-linked  
161 oligosaccharides, likely compromise the efficacy of PNGase F; the unique composition of *C. reinhardtii* O-  
162 glycans would limit the efficacy of the O-glycosidase cocktail used (Joshi et al., 2018; Mathieu-Rivet et al.,  
163 2020).

#### 164 **HEK-293 cells synthesize and secrete heavily glycosylated, amidated proGATI**

165 To facilitate our understanding of the proGATI protein and the modifications involved in producing the  
166 amidated 75 kDa protein secreted in mating ectosomes, we stably expressed a cDNA encoding preproGATI  
167 in a human embryonic kidney cell line (HEK-293). In *C. reinhardtii*, as in other species, maturation of newly  
168 synthesized glycoproteins and their ability to move from the ER into the Golgi are monitored by their  
169 interactions with calnexin and calreticulin (Mathieu-Rivet et al., 2020). We reasoned that the efficient  
170 secretion of proGATI by HEK-293 cells would indicate proper folding and allow usage of tools available to  
171 study vertebrate N- and O-glycosylation. Affinity-purified C-ter proGATI antibodies were used to evaluate  
172 cell extracts and spent medium. Specific bands of 120 kDa and 170 kDa were detected in cell extracts by  
173 both N-ter and C-ter antibodies (Figs. 2A and S2A). A minor doublet at ~37-kDa was also detected in cell  
174 extracts, but not in spent medium (Fig. 2A). The fact that spent medium contains a single 170-kDa protein  
175 recognized by both N-ter and C-ter antibodies led to its identification as HEK-proGATI; differences in the  
176 N- and O-linked oligosaccharides attached to proGATI produced by HEK cells and by *C. reinhardtii* would  
177 account for the difference in apparent molecular mass.

178 To test whether HEK-293 cells amidate proGATI, bathocuproine disulfonate (BCS) was used to deplete  
179 cellular copper, inhibiting the activity of the amidating enzyme, PAM (Bonnemaison et al., 2015). While  
180 the 170-kDa N-ter signal was unaltered following BCS treatment, the 170-kDa C-ter signal fell dramatically  
181 (Fig. 2B). To account for any differences in secretion rate, the ratio of 170-kDa C-ter signal to 170-kDa N-  
182 ter signal was calculated. BCS treatment caused a four-fold reduction in this ratio, consistent with the  
183 conclusion that HEK-293 cells amidate the C-terminus of the proGATI that they secrete (Fig. 2C).

184 ProGATI includes six potential N-glycosylation sites (Asn-X-Ser/Thr) and several potential O-glycosylation  
185 sites (-Ser/Thr and HyP) (Fig. S1D). Digestion with either PNGase F or a mixture of O-glycosidase and  
186 neuraminidase reduced the apparent molecular mass of secreted HEK-proGATI by ~15-20 kDa, consistent  
187 with the occurrence of extensive N- and O-glycosylation (Fig. 2D).

188 Successful ectosome-mediated delivery of a chemomodulatory peptide such as GATI-NH<sub>2</sub> would require  
189 it to be resistant to proteolysis. Spent medium containing HEK-proGATI was used to test this hypothesis.  
190 Exposure to increasing amounts of trypsin eliminated the N-ter signal and generated a series of smaller  
191 products recognized by the C-ter antibody (Fig. 2E). Cleavage at the single Lys residue in the N-ter peptide  
192 is consistent with this result (Fig. 1A). Trypsin produced a sequence of smaller products detected by the  
193 C-ter antibody. C-ter signal intensity was not diminished, with essentially complete conversion of 170 kDa

194 HEK-proGATI into a 50 kDa and then a 37-kDa product, which may resemble the amidated 75 kDa C-ter  
195 fragment found in mating ectosomes (Fig. 2E).

### 196 **Purification and domain organization of proGATI**

197 Since HEK-proGATI is amidated and secreted rapidly (Fig. S2B), we undertook its purification from spent  
198 medium (Fig. 3A and S2C) and analysis using mass spectrometry. Although the N- and O-glycans attached  
199 to HEK-proGATI will differ from those attached to proGATI produced by *C. reinhardtii*, the sites available  
200 to enzymes involved in N- and O-glycosylation are expected to be the same. Purified native and  
201 deglycosylated HEK-proGATI were analyzed, using a cocktail of enzymes designed to remove both N- and  
202 O-linked glycans. Deglycosylation reduced its apparent molecular mass by ~30 kDa (Fig. 3B).

203 Mass spectrometry of native HEK-proGATI identified four O-glycosylated Ser residues and two O-  
204 glycosylated HyP residues. Analysis of enzymatically deglycosylated HEK-proGATI identified five N-  
205 glycosylation sites. The amidated C-terminus (-GATI-NH<sub>2</sub>) was found in both samples; C-terminal peptides  
206 ending in -Gly and -Gly-Arg were also identified indicating that carboxypeptidase processing and  
207 amidation had not gone to completion (Fig. 3C and D). Peptides spanning the entire sequence of HEK-  
208 proGATI were identified (87.3% coverage) (Fig. 3D).

209 The ability of trypsin to convert amidated HEK-proGATI into stable, amidated products as small as 37 kDa  
210 (Fig. 2E), is consistent with the presence of stable domains. To explore this possibility, a structural model  
211 of proGATI was generated using RoseTTAFold (Baek et al., 2021). The proGATI prediction includes three  
212 well-folded domains connected by highly extended, Pro-rich flexible linkers (Fig. 3E). The signal sequence  
213 was not included in the structural model. N-terminal domain 1 contains 323 residues (green), terminating  
214 just before a Pro-rich region. Domain 2 includes 153 residues and domain 3 has 213 residues, ending at  
215 the C-terminus. The 70-residue linker between domains 1 and 2 contains 37 Pro residues and a furin-like  
216 site (K<sup>407</sup>PRK), while 43 of the 99 residues in the second linker are Pro residues; these very Pro-rich regions  
217 likely contribute to the abnormal migration of proGATI during SDS-PAGE. Domain 3 forms an antiparallel  
218 β-sandwich and has a nominal molecular mass of 23 kDa with a pI of 10 (Fig. 3E). This domain corresponds  
219 precisely to the C-terminal region identified by mass spectrometry of the 75-kDa amidated product in  
220 mating ectosomes, and is immediately preceded by a furin-like cleavage site. Cleavage at this site alone  
221 would release domains 1 and 2 (predicted to represent the 120-kDa N-terminal fragment), while further  
222 proteolysis at K<sup>407</sup> might generate the 63-kDa N-terminal product. Domain 3, which includes four Cys  
223 residues, has a single predicted disulfide bond (C<sup>739</sup> and C<sup>745</sup>); although C<sup>742</sup> and C<sup>817</sup> are located close to  
224 each other, a significant rearrangement would be needed for disulfide bond formation. Importantly, the  
225 experimentally confirmed C-terminal amidation site, the Pro residue that is O-glycosylated (P<sup>896</sup>) and both  
226 Asn residues that are N-glycosylated (Asn<sup>814</sup>ThrThr and Asn<sup>833</sup>GlnThr) are completely exposed and  
227 accessible for modification in the model structure (Fig. S3).

### 228 **Ciliary localization and mating type-specific processing of proGATI**

229 Under nutrient deprivation conditions, *C. reinhardtii* cells differentiate into *minus* and *plus* gametes that  
230 expresses mating type-specific genes, enabling them to recognize each other. Our previous study showed  
231 that CrPAM expression increased during gametogenesis, and that the C-ter antigenic peptide and a longer  
232 synthetic amidated peptide (VLYPNDAAYAAYAPGTGGGATI-NH<sub>2</sub>) produced a mating type-specific  
233 chemotactic response, attracting *minus* gametes and repelling *plus* gametes (Luxmi et al., 2019). These

234 observations prompted investigation of proGATI in gametes. Cells, deciliated cell bodies and cilia were  
235 subjected to immunoblot analysis. Use of the N-ter and C-ter antibodies revealed enrichment of 250-kDa  
236 proGATI in the cilia of both *minus* and *plus* gametes (Fig. 4A). In contrast, the C-ter antibody detected a  
237 75-kDa band only in *plus* gametes; while detectable in *plus* gamete cells, the 75-kDa band was enriched in  
238 *plus* gamete cilia and essentially undetectable in deciliated cell bodies. Strikingly, production of amidated  
239 75-kDa GATI is specific to *plus* gametes (Fig. 4A and 4B). Mass spectrometric analysis of 75-kDa GATI  
240 immunoprecipitated from *plus* gamete cell lysates confirmed complete amidation of its C-terminus and  
241 the presence of peptides like those identified in 75-kDa GATI immunoprecipitated from mating ectosomes  
242 (Figs. 1E, F and S4).

243 We next used immunofluorescence microscopy to determine the subcellular localization of GATI-derived  
244 proteins in resting gametes. Maximal Z-projection confocal images of *minus* and *plus* gametes showed  
245 that the C-ter GATI signal was localized in discrete puncta throughout the cytoplasm (Fig. 4C); this signal  
246 could represent intact 250-kDa proGATI and/or the 75-kDa C-ter product derived from it. In contrast,  
247 simultaneous visualization of FMG1, a ciliary membrane glycoprotein, revealed more signal in the cilia and  
248 around the margins of the cell body. Single Z-stack images showed the accumulation of C-ter GATI signal  
249 at the cell surface, co-localized with FMG1 (Fig. 4C, inset). Diffuse C-ter GATI signal along the length of the  
250 cilia was also observed in both mating types (Fig. 4C). To confirm staining specificity, the C-ter antibody  
251 was pre-incubated with antigenic peptide; signal intensity (green) was greatly reduced in the cell body,  
252 on the cell surface and in cilia of *plus* gametes (Fig. 4C, lower panel). The punctate staining in the cell body  
253 could represent Golgi-derived vesicles, which may enter the ciliary membrane after accumulating on the  
254 cell surface.

### 255 **Mating triggers ectosomal trafficking and processing of the GATI-precursor**

256 Ectosome formation involves outward budding of the ciliary membrane (Wood et al., 2013). The initiation  
257 of mating triggers the formation and release of ectosomes (Cao et al., 2015); the catalytic domains of  
258 CrPAM are exposed on the outer surface of mating ectosomes and PAM is not found in the soluble  
259 secretome (Kumar et al., 2016a; Luxmi et al., 2019). ProGATI, which lacks a transmembrane domain, is in  
260 both mating ectosomes and the secretome. We utilized affinity-purified proGATI antibodies and  
261 immunogold-electron microscopy to determine its ectosomal localization.

262 Ectosomes from mating gametes were embedded in agarose and imaged by thin section transmission EM  
263 (Fig. 5A); the vesicles range from ~80 nm to ~260 nm in diameter. Following incubation with intact  
264 ectosomes, affinity-purified proGATI antibodies were visualized using a gold-tagged anti-rabbit secondary  
265 antibody and negative stain EM; signals obtained with both antibodies were localized on the ectosome  
266 surface (Fig. 5A). Ectosomes incubated only with gold-conjugated secondary antibody served as a negative  
267 control.

268 Ectosomes, deciliated mixed gamete cell bodies and cilia prepared 1 h after the initiation of mating were  
269 subject to immunoblot analysis (Fig. 5B). Based on use of both the N-ter and C-ter antibodies, cilia  
270 contained only 250-kDa proGATI. In contrast, mating ectosomes contained 250-kDa proGATI along with  
271 the 120 kDa N-ter fragment and the 75 kDa C-ter fragment, whereas proGATI products were not detected  
272 in the cell bodies (Fig. 5B). Quantification revealed enrichment of 250-kDa proGATI in mating ectosomes

273 and an even greater enrichment of both the 120 kDa and 75 kDa fragments (Fig. 5C), suggesting that the  
274 cleavage creating them occurs on the ectosomal surface.

275 For comparison, we evaluated the specificity and selectivity with which two other ciliary proteins, CrPAM  
276 and FMG1, move from cilia into ectosomes during mating (Fig. 5D and E). CrPAM was previously identified  
277 in mating ectosomes, but was not found in vegetative ectosomes (Luxmi et al., 2019), while FMG1 is  
278 present in both (Long et al., 2016; Luxmi et al., 2019). Immunoblot analysis confirmed the presence of  
279 both CrPAM and FMG1 in mating ectosomes. After an hour of mating, very little CrPAM remained in the  
280 cilia; although mating ectosomes contained CrPAM, its ectosomal levels did not exceed those in the cell  
281 body (Fig. 5D). FMG1 levels in cilia and mating ectosomes greatly exceeded those in cell bodies, but FMG1  
282 levels in mating ectosomes did not exceed those in cilia (Fig. 5E). Thus, the cell bodies of mating gametes  
283 were essentially devoid of proGATI while both CrPAM and FMG1 were readily detected.

#### 284 **Differential release of proGATI products from mating ectosomes**

285 We previously found that both CrPAM protein and enzyme activity associate with the ciliary axoneme;  
286 this interaction is disrupted by treatment with 0.6 M NaCl following detergent extraction (Kumar et al.,  
287 2016a). To explore the ciliary distribution of proGATI and its products, we isolated cilia from resting  
288 gametes of both mating types and from 1 h mixed gametes. Isolated cilia were first treated with Triton X-  
289 100 to release membrane proteins and soluble matrix components. This was followed by treatment with  
290 0.6 M NaCl to extract proteins that were tightly bound to the axoneme; the resulting extracted axoneme  
291 pellet was solubilized in 1× SDS buffer.

292 The amidated 75-kDa GATI product was detected in the cilia of *plus* but not *minus* gametes (Figs. 6A and  
293 B). This fragment was largely recovered in the detergent soluble fraction, with a smaller amount released  
294 by 0.6 M NaCl; it was not present in the axonemal fraction of *plus* gametes. The 250-kDa proGATI protein  
295 was in the detergent soluble, 0.6 M NaCl and axonemal fractions from both gametes (Figs. 6A and B).  
296 During gamete mating, the amidated 75-kDa GATI product and the 250-kDa proGATI protein were  
297 released into ectosomes (Figs. 6A and B). The presence of an N-terminal fragment of proGATI in ectosomes  
298 but not in the ciliary fractions suggested that cleavage of 250 kDa proGATI occurs on the ectosomal  
299 surface.

300 To evaluate how 250 kDa proGATI (which lacks a transmembrane domain) associates with the ectosome  
301 surface, freshly isolated ectosomes were washed with 10 mM HEPES buffer (control) or with buffer  
302 containing 10 mM dithiothreitol (DTT) or 10 mM EDTA, and the resulting supernatants examined for the  
303 release of GATI products, CrPAM and FMG1 (Figs. 6C and D). Neither 250-kDa proGATI, CrPAM nor FMG1  
304 was solubilized, with signal detected only in the ectosomal pellets. In contrast, the amidated 75-kDa C-  
305 terminal product and N-terminal 63-kDa segment were both released by washing with low ionic strength  
306 HEPES buffer; release did not occur following chelation of divalent cations with EDTA. Although not  
307 released by buffer alone or by EDTA treatment, the N-terminal 120-kDa GATI fragment was partially  
308 displaced from ectosomes by 10 mM DTT. This effect was DTT-specific; treatment with 10 mM  $\beta$ -  
309 mercaptoethanol had no effect (Fig. S5). These results suggest that all three domains individually mediate  
310 associations with the ectosomal surface. This tripartite attachment mechanism likely explains why release  
311 of 250-kDa amidated proGATI was not observed under any conditions.

#### 312 **Distribution, processing and amidation of putative prohormone convertases in cilia**



313 The appearance and accumulation of the 75-kDa amidated proGATI product on *plus* (but not *minus*)  
314 gamete cilia, and of both 120- and 75-kDa proGATI products on mating ectosomes, suggested that  
315 proteolytic processing occurs on the ciliary and/or ectosomal surface or during the sorting and transit of  
316 the precursor from cilia into nascent ectosomes. Mating ectosomes contain two subtilisin-like proteases,  
317 SUB14 and VLE1; they are the closest *Chlamydomonas* homologs of mammalian prohormone convertases  
318 PC2 and PCSK7, respectively (Luxmi et al., 2019). To address the ciliary distribution of these putative  
319 prohormone convertases, we performed comparative proteomics of cilia from vegetative and gametic  
320 cells of both mating types. This confirmed the presence of VLE1 in vegetative cilia of both mating types  
321 (Kubo et al., 2009); SUB14 was not detectable in vegetative cilia (Fig.7A and Supplemental Data File 1).  
322 Strikingly, VLE1 was identified in the cilia of *plus* gametes, but was not detected in *minus* gamete cilia.  
323 SUB14 expression was also mating type specific, but it was present in the cilia of *minus*, but not *plus*,  
324 gametes (Fig.7A). In consequence, VLE1 is the only putative prohormone convertase present in ciliary  
325 samples that contain proteolytically processed proGATI products.

326 Peptides from the cytosolic, pro-, S8 and C-terminal domains of VLE1 (Fig. 7B) were identified in cilia from  
327 vegetative and *plus* gamete cells. In contrast, mating ectosomes and the secretome contained only  
328 peptides from the S8 and C-terminal domains (Fig. 7B). Activation of subtilisin-like prohormone  
329 convertases generally requires autoproteolytic cleavage and subsequent dissociation of the pro-domain  
330 (Shakya and Lindberg, 2020). Clustal analysis identified the –Gly-Arg-Arg site that immediately precedes  
331 the catalytic domain as the likely site for autoactivation. Autoproteolytic cleavage at this site, followed  
332 by exoproteolytic removal of the two Arg residues would produce an amidation site. Mass spectrometry  
333 revealed that all of the ciliary VLE1 had been proteolytically processed at this site and was amidated  
334 (Fig.7B); partially processed peptides derived from this region of VLE1 and ending in –Gly, –Gly-Arg or –  
335 Gly-Arg-Arg were not observed. Detailed analysis of the predicted VLE1 structure (Fig. 7C) and peptides  
336 identified in cilia suggests that the pro-domain remains associated with the S8 domain, tethering it to the  
337 ciliary membrane even after autoproteolytic cleavage and amidation.

## 338 Discussion

339 Identification of an amidated peptide that has a mating-type specific effect on *C. reinhardtii* mobility led  
340 us to explore the properties of its putative precursor, the manner in which this precursor might be  
341 converted into smaller products, and the regulated secretion of its product peptides.

342 **ProGATI undergoes extensive post-translational modification and contains multiple domains.** The *C.*  
343 *reinhardtii* genome encodes hundreds of proteins with the general characteristics of prepropeptides  
344 (Luxmi et al., 2019). As observed in the ER of metazoans, preproGATI undergoes signal peptide removal,  
345 along with the first steps of N- and O-glycosylation (Fig. 8A). ProGATI, like many other putative *C.*  
346 *reinhardtii* propeptides, is quite large, with a predicted molecular mass of 90.6 kDa, and multiple domains  
347 connected by Pro-rich linker regions. In addition to the Asn and Ser/Thr sites subject to N- and O-  
348 glycosylation in metazoan propeptides, hydroxy-Pro residues in domains 1 and 3 of proGATI are O-  
349 glycosylated (Fig. 3). In plants and algae, hydroxy-Pro residues are major O-glycosylation sites for addition  
350 of pentose (arabinogalactan) sugars (Bollig et al., 2007; Tan et al., 2003). With a unique core structure to  
351 their N-glycans and unique O-glycosyl transferases, propeptides synthesized by *C. reinhardtii* differ in

352 important ways from metazoan propeptides (Joshi et al., 2018; Mathieu-Rivet et al., 2020; Schulze et al.,  
353 2017; Xu et al., 2020).

354 With the endoproteolytic cleavage of proGATI limited to the surface of mating ectosomes (Fig. 5), we  
355 considered the possibility that its structural domains might play a role in its localization. Despite sharing  
356 little sequence similarity, a DALI search (Holm, 2020) revealed structural relatives for each proGATI  
357 domain: domain 1 is distantly similar to halohydrin dehalogenase from *Ilumobacter coccineus* (z score =  
358 6.2, RMSD = 13.6 Å; 6I9W); domain 2 is related to EPR3 (a carbohydrate receptor) from *Lotus japonicus* (z  
359 score = 4.2, RMSD = 2.4 Å; 6QUP); and domain 3 resembles a chitosanase from *Paenibacillus sp.* (z score  
360 = 9.3, RMSD = 2.5 Å; 4ZXE). The ability of EPR3 and chitosanase to interact with carbohydrates  
361 (Kawaharada et al., 2015; Lopez-Moya et al., 2019; Wong et al., 2020) suggests that domains 2 and 3 might  
362 play a role in the tripartite interaction of proGATI with the ectosomal surface, with subsequent  
363 endoproteolytic cleavages facilitating release of specific fragments.

364 For signaling peptides released on ectosomes, protease resistance may be especially important. Domain  
365 3 corresponds precisely to the 75-kDa C-ter fragment (Fig. 3E). N-glycosylation of the two potential sites  
366 in domain 3, along with O-glycosylation of a hydroxy-Pro located nine residues from the amidated C-  
367 terminus likely accounts for the ~50 kDa discrepancy between its apparent molecular mass and the mass  
368 of its polypeptide chain (23 kDa) (Figs 3 and 8A). The endoproteolytic cleavage that produces 75-kDa C-  
369 ter fragment in ectosomes would also produce the 120-kDa N-ter fragment. Although the C-terminus of  
370 proGATI is accessible to PAM, converting its C-terminus from -GATI-Gly to -GATI-NH<sub>2</sub>, the amidated C-  
371 terminus is trypsin resistant (Fig. 2) and stable when exposed on the ciliary membrane and the surface of  
372 mating ectosomes.

373 Examination of the first *C. reinhardtii* protein known to serve as a peptide precursor indicates that it shares  
374 many similarities with vertebrate peptide precursors. However, its larger size, more complex domain  
375 organization and extensive modifications suggest that this precursor carries additional information  
376 needed to ensure that its signaling task can be accomplished.

377 **Controlling the endoproteolytic cleavage of proGATI.** ProGATI cleavage is linked to both mating type and  
378 subcellular location (Fig. 8B). The cell bodies of *plus* and *minus* gametes contain intact proGATI, but the  
379 75-kDa C-ter fragment is found only in the cilia of *plus* gametes. Both N- and C-ter proGATI fragments  
380 accumulate in mating ectosomes. In metazoans, the cell type-specific cleavage of propeptides such as  
381 proopiomelanocortin (Kumar et al., 2016b) and proglucagon (Drucker, 2018) reflects the cell type-specific  
382 expression of subtilisin-like prohormone convertases. Mating ectosomes contain only two subtilisin-like  
383 proteases, VLE1 and SUB14 (Luxmi et al., 2018). The presence of VLE1, but not SUB14, in the cilia of *plus*  
384 gametes, where proGATI cleavage occurs, suggests that VLE1 serves as a proGATI convertase. VLE1 is also  
385 localized to the ciliary membrane in vegetative cells (Kubo et al., 2009; Wood et al., 2013); its release into  
386 vegetative ectosomes provides access to the mother cell wall, which it degrades, allowing release of  
387 mitotic progeny. A matrix metalloproteinase (gametolysin), not VLE1, cleaves the gametic cell wall prior  
388 to fusion (Kinoshita et al., 1992), suggesting that VLE1 has additional targets on *plus* gamete cilia and/or  
389 in the extracellular milieu. VLE1 cleaves to the C-terminal side of basic residues, although the required  
390 sequence context is poorly understood (Matsuda et al., 1995). Endoproteolytic cleavage of proGATI after

391 a basic residue within a furin-like cleavage site (R<sup>693</sup>FSR↓) produces the amidated 75 kDa C-ter fragment  
392 (Figs. 1F and 8A).

393 In metazoans, luminal pH plays a central role in controlling prohormone convertase activation and the  
394 storage of product peptides in secretory granules (Halban, 1991). With proGATI cleavage products  
395 accumulating on the surface of mating ectosomes, luminal pH cannot serve as a regulatory factor. The  
396 pro-domains of subtilisin-like endoproteases facilitate catalytic domain folding and inhibit activity.  
397 Protease activation requires autoproteolytic cleavage, separating the pro-domain from the catalytic  
398 domain (Shakya and Lindberg, 2020). Additional cleavages within the pro-domain may also be required  
399 for pro-domain release and S8 domain activation. Consistent with this, active VLE1 purified from culture  
400 medium following hatching lacked its pro-domain (Kubo et al., 2009). Our analysis of the soluble mating  
401 secretome identified the intact VLE1 S8/C-terminal domain, but not the N-terminal/pro-domain (Fig. 8B).

402 Sequence analysis revealed an unusual pro-domain in VLE1, with homologous sequences found only in  
403 other members of the volvocine algae (*e.g.* the protease VheA, required for release of juvenile *Volvox*  
404 from the parental spheroid (Fukada et al., 2006)). To understand how VLE1 activation might occur, a  
405 structural model was built using RoseTTAFold (Baek et al., 2021) (Figs. 7C and S6). The active site contains  
406 a classic Ser-His-Asp catalytic triad and an Asn residue that stabilizes the transition state in the oxyanion  
407 hole (Fig. 7C) (Shakya and Lindberg, 2020). The VLE1 pro-domain consists of an  $\alpha/\beta$  fold that makes  
408 extensive contact with one face of the S8 domain. Emanating from this  $\alpha/\beta$  region is an extended strand  
409 that arches over the active site, occluding it; the –Gly-Arg-Arg cleavage/amidation site is exposed on the  
410 surface. Given the large surface area buried by the pro-domain, cleavage at the –Gly-Arg-Arg site seems  
411 unlikely to result in pro-domain release from the catalytic core.

412 For amidation to occur, the extended strand must swing away from the catalytic site, enabling  
413 carboxypeptidases to remove remaining Arg residue(s) and allowing PAM to access the exposed Gly  
414 residue. The functional consequences of amidation at this site remain to be determined. Binding of the  
415 amidated pro-domain C-terminus to a target protein might facilitate retention of the N-terminal/pro-  
416 domain of this type II membrane protein in the ciliary membrane, allowing the enzymatically active S8/C-  
417 terminal domain to enter mating ectosomes.

418 **Ciliary ectosomes as an ancient mode of rapid, regulated secretion.** Changes in protein expression allow  
419 unicellular organisms like *C. reinhardtii* to regulate secretion of the enzymes needed to acquire specific  
420 nutrients, but this type of response requires time. In metazoans, peptides stored in secretory granules  
421 can be released within milliseconds of signal receipt. Our data indicate that ciliary ectosomes serve as an  
422 ancient mode of rapid, regulated secretion. Like the assembly of secretory granules, the assembly of  
423 ciliary ectosomes is a highly regulated process. The cilia of both vegetative cells and mating gametes  
424 release bioactive ectosomes; their compositions are unique and developmentally regulated (Wood et al.,  
425 2013; Long et al., 2016; Cao et al., 2015; Luxmi et al., 2019). Since ectosomes are formed from the ciliary  
426 membrane, proteins targeted to ectosomes must first gain access to the cilium. The transition zone plays  
427 an essential role in establishing and maintaining the unique lipid and protein composition of the ciliary  
428 membrane (Long and Huang, 2020; Nachury and Mick, 2019; Takao and Verhey, 2016).

429 The entry of ciliary proteins into ectosomes is also regulated. Differences in the ectosomal trafficking of  
430 PAM, VLE1 and proGATI illustrate key features of this regulatory step (Fig. 8B). CrPAM is found in mating

431 ectosomes but not in vegetative ectosomes (Luxmi et al., 2019); cleavage of CrPAM does not occur and  
432 active enzyme does not appear in the soluble secretome. While VLE1 is found in the cilia of *plus* gametes,  
433 the presence of the N-terminal/pro-domains, along with the intact S8/C-terminal domains suggests that  
434 ciliary VLE1 is not active. VLE1 recovered from mating ectosomes and the secretome lacks the N-  
435 terminal/pro-domains, indicating that it has been activated. While proGATI is present in the cilia of *plus*  
436 and *minus* gametes, cleavage occurs only in the cilia of *plus* gametes; more extensive cleavage of proGATI  
437 is linked to its release in mating ectosomes, where both N-ter and C-ter fragments accumulate. Although  
438 metazoan secretory granules generally store mature product peptides, the cleavage of proatrial  
439 natriuretic factor by corin, a type II plasma membrane enzyme like VLE1, is tied to the exocytosis of atrial  
440 granules (Glembotski et al., 1988).

441 Metazoan peptide-containing secretory granules can be stored for long periods of time, with release  
442 responding rapidly to receptor-mediated secretagogue stimulation. In *C. reinhardtii*, ciliary adhesion of  
443 mating gametes causes ectosomes to appear on the ciliary surface in a process that requires receptor-  
444 mediated signaling; strikingly, activating gametes directly with dibutyryl-cAMP does not lead to ectosome  
445 release (Cao et al., 2015). The signals that control food intake in mammals require localization of the  
446 melanocortin-4 receptor to the primary cilia of hypothalamic neurons (Wang et al., 2021). The ciliary  
447 localization of free fatty acid receptor-4 and prostaglandin-E receptor-4 in  $\alpha$ - and  $\beta$ -cells plays an essential  
448 role in hormone secretion (Wu et al., 2021) and mice lacking primary cilia on their  $\beta$ -cells exhibit impaired  
449 glucose homeostasis and develop diabetes (Hughes et al., 2020).

450 As observed in mammals, multiple receptors have been identified in *C. reinhardtii* cilia (Huang et al., 2004;  
451 Luxmi et al., 2019; Ranjan et al., 2019). By taking advantage of the ease with which cilia can be isolated  
452 from *C. reinhardtii*, its precisely delineated sexual reproductive cycle and the identification of a bioactive  
453 amidated peptide in mating ectosomes, it is now clear that cilia provide a means of controlling  
454 endoproteolytic processing of propeptides and the release of mature bioactive peptide products.  
455 Although, the stimulus-dependent secretion of neuropeptides from dense core vesicles stored at the  
456 presynaptic endings of axons or exported to dendrites has been well studied (Ding et al., 2019), whether  
457 bioactive peptides are released from the primary cilia of neurons and endocrine cells remains to be  
458 determined.

459 In summary, this study provides a mechanism through which amidated peptide products are synthesized,  
460 post-translationally modified, trafficked into cilia and released into ciliary ectosomes by a unicellular  
461 organism, *C. reinhardtii*. As both cilia and the peptidergic signaling machinery are conserved throughout  
462 eukaryotes, this study should shed light on the mechanisms through which cilia-based secretion is  
463 regulated in health and dysregulated in various ciliopathies.

464

## 465 Key Resource Table

| Reagent or Resource                                 | Source                               | Identifier                                                                                              |
|-----------------------------------------------------|--------------------------------------|---------------------------------------------------------------------------------------------------------|
| <b>Antibodies</b>                                   |                                      |                                                                                                         |
| CrPAM luminal (rabbit)                              | (Kumar, 2017)                        | CrPHM-PAL-rhod                                                                                          |
| CrFMG1 (mouse)                                      | Dr. R. Bloodgood                     | (Bloodgood et al., 1986)                                                                                |
| ProGATI N-ter (rabbit)                              | This study                           | CT237(N-ter)                                                                                            |
| ProGATI C-ter (rabbit)                              | This study                           | CT237(C-ter)                                                                                            |
| <b>Chemicals, Peptides, Reagent Kits</b>            |                                      |                                                                                                         |
| Amidated peptide, GATI-NH <sub>2</sub>              | Biomatik                             | (Luxmi et al., 2019)                                                                                    |
| Control peptide, GATI-OH                            | Biomatik                             | (Luxmi et al., 2019)                                                                                    |
| Glycine-extended peptide, GATI-Gly                  | Biomatik                             | (Luxmi et al., 2019)                                                                                    |
| N-ter peptide (CYELGLDIDGKPAHPAAT-NH <sub>2</sub> ) | Biomatik                             | This study                                                                                              |
| <b>Experimental model</b>                           |                                      |                                                                                                         |
| <i>Chlamydomonas reinhardtii</i> strains            | <i>Chlamydomonas</i> resource center | CC124 and CC125                                                                                         |
| HEK-293 cells                                       | American Type Culture Collection     | CRL-1573                                                                                                |
| <b>Software</b>                                     |                                      |                                                                                                         |
| Image J                                             | NIH                                  | <a href="https://imagej.nih.gov/ij/">https://imagej.nih.gov/ij/</a>                                     |
| UNICORN FPLC software                               | GE Healthcare                        | ver. 5.2                                                                                                |
| Prism 5                                             | GraphPad                             | <a href="https://www.graphpad.com">https://www.graphpad.com</a>                                         |
| PyMOL                                               | Schrödinger LLC                      | ver. 2.4.0 <a href="https://pymol.org">https://pymol.org</a>                                            |
| RoseTTAFold                                         | Baker laboratory                     | <a href="https://robetta.bakerlab.org/">https://robetta.bakerlab.org/</a>                               |
| DALI                                                | Holm Group                           | <a href="https://ekhidna2.biocenter.helsinki.fi/dali/">https://ekhidna2.biocenter.helsinki.fi/dali/</a> |

466

## 467 Methods

### 468 *Chlamydomonas* cell culture and gametogenesis induction

469 Wild type *C. reinhardtii* mating type *minus* (CC124) and *plus* (CC125) strains were cultured in R-medium  
 470 (Harris, 2009) aerated with 95% air and 5% CO<sub>2</sub> under a 12 h light/12 h dark cycle at 22 °C. The strains were  
 471 obtained from the *Chlamydomonas* Resource Center (<https://www.chlamycollection.org/>). To induce

472 gametogenesis, vegetative cells of both mating types were washed, and resuspended in nitrogen-deficient  
473 minimal medium (M-N medium) for 24-36 h under aeration and a 12 h light/12 h dark cycle.

#### 474 **Preparation of ectosomes, cilia and cell lysates from mating gametes**

475 Gametes of both mating types were resuspended in 10 ml of fresh nitrogen-free M-N medium at a density  
476 of  $5 \times 10^6$  cells/ml. An equal number of mating type *minus* and *plus* gametes were mixed for 1 h; after  
477 incubation, ectosomes were isolated by differential centrifugation as described previously (Luxmi et al.,  
478 2019). Ectosome-enriched pellets were resuspended in TMT buffer [20 mM 2-[tris(hydroxymethyl)-  
479 methylamino]-ethanesulfonic acid (TES), pH 7.4, 10 mM mannitol, 1% Triton X-100] containing a protease  
480 inhibitor cocktail (cOmplete ULTRA Tablets, # 05892791001, Roche, Basel, Switzerland) and 0.3 mg/ml  
481 phenylmethylsulfonyl fluoride (PMSF, Sigma Chemical Co., St. Louis, MO). For electron microscopy (see  
482 below), ectosome-rich pellets were resuspended in 10 mM HEPES buffer containing the same protease  
483 inhibitors.

484 Cell lysates were prepared as described previously (Luxmi et al., 2019). *Minus* and *plus* mixed gametic cells  
485 were harvested by centrifugation at 1,600 xg and resuspended in TMT buffer containing 0.2 M NaCl, the  
486 protease inhibitor cocktail and 0.3 mg/ml PMSF. Gametes were deciliated using dibucaine and cilia isolated  
487 by standard methods and resuspended in HMS buffer (10 mM HEPES, pH7.4, 5 mM MgSO<sub>4</sub> and 4% sucrose)  
488 (King, 1995; Witman, 1986); the deciliated cell bodies were resuspended in TMT buffer containing 0.2M  
489 NaCl, protease inhibitor cocktail and 0.3 mg/ml PMSF. Protein content was determined using the  
490 bicinchoninic acid assay (BCA) (Thermo Fisher Scientific, Rockford, IL, USA).

491 Samples for electrophoresis were prepared by mixing with 2× Laemmli sample buffer (Bio-rad, Hercules,  
492 California) and denatured at 55°C for 5 min; samples were fractionated in Criterion TGX 4–15% SDS-PAGE  
493 gradient gels (Bio-rad) and transferred to PVDF membranes. Proteins were visualized using Coomassie  
494 brilliant blue, the blots destained and then blocked using 5% milk dissolved in 1% Tween-20 in Tris-buffered  
495 saline. Incubation with primary antibodies was carried out overnight at 4°C; after washing, horseradish  
496 peroxidase-tagged second antibody (Thermo Fisher Scientific) was applied for 1 h at room temperature  
497 and the signal visualized using SuperSignal enhanced chemiluminescent (ECL) reagent (Thermo Fisher  
498 Scientific, #34080).

#### 499 **Ciliary fractionation**

500 Isolated cilia were incubated with TMT buffer for 60 min at 4°C, to solubilize ciliary membrane and matrix  
501 proteins. The remaining axonemes were incubated with 0.6 M NaCl in TM buffer to release axonemal  
502 proteins tightly bound *via* ionic interactions. The extracted axonemal pellet was dissolved in SDS lysis buffer  
503 (0.5% (w/v) sodium dodecyl sulfate, 0.05 M Tris.Cl, pH 8.0) containing protease inhibitor cocktail and 0.3  
504 mg/ml PMSF. Soluble samples were desalted and concentrated using Amicon concentrators (10-kDa cut-  
505 off; Millipore Sigma, # UFC800308; Merck KGaA, Darmstadt, Germany). Samples (20 µg protein) were  
506 fractionated by SDS-PAGE and analyzed by immunoblotting.

#### 507 **Immunofluorescence microscopy**

508 Resting gametes were harvested by centrifugation at 1,600 xg and fixed with 2% paraformaldehyde in  
509 buffer containing 30 mM HEPES, 5 mM EGTA, 5 mM MgSO<sub>4</sub>, 25 mM KCl, 4% sucrose, pH 7.0. Cells were  
510 allowed to adhere to 0.1% polyethyleneimine-coated coverslips for 10 min and then treated with methanol

511 for 10 min at -20°C. Subsequent blocking and antibody incubation were done as described (Luxmi et al.,  
512 2019). Primary antibodies used were affinity-purified rabbit N-ter and C-ter proGATI antibodies (from  
513 CT327; 1:500) and mouse FMG1 (1:1000). Alexa 488 anti-rabbit (Life Technologies, Thermo Fisher  
514 Scientific) (1:500) and Cy3 anti-mouse (Jackson ImmunoResearch Laboratories, West Grove, PA) (1:2000)  
515 conjugates were used as secondary antibodies. Images were obtained using a Zeiss 880 confocal  
516 microscope with a 63× oil objective.

### 517 **Electron microscopy analysis**

518 Immuno-gold labeling of ectosomes was performed as described previously (Luxmi et al., 2019) with the  
519 following modifications. Freshly isolated mating ectosomes were fixed with 1% paraformaldehyde (EM  
520 grade) and incubated on ice for 30 min. Fixed samples were placed on glow-discharged 400-mesh carbon-  
521 coated nickel grids (Electron Microscopy Sciences, Hatfield, PA) for 10-20 min and then washed with 1x PBS  
522 (137 mM NaCl, 10 mM phosphate, 2.7 mM KCl pH 7.4) and incubated with 50 mM glycine. Samples were  
523 incubated overnight at 4°C with affinity-purified N-ter and C-ter antibodies (1:10), washed and incubated  
524 for 1 h at room temperature with gold conjugated (10-nm) goat anti-rabbit-IgG (1:15, Electron Microscopy  
525 Sciences).

526 For thin section EM, freshly isolated ectosomes were fixed with 2.5% glutaraldehyde in 0.1 M cacodylate  
527 buffer, pH 7.4 for 1 h at 4°C. After fixation, ectosomes were centrifuged at 424,000 xg for 30 min and the  
528 ectosome pellet was washed with 0.1 M cacodylate buffer, pH 7.4. Pellets were then transferred to 0.5 ml  
529 tubes; after the buffer was carefully removed, ultra-low gelling agarose (100 µl of 4%) was added and the  
530 sample was immediately centrifuged at 1,600 xg for 10 min at room temperature. Tubes were then placed  
531 on ice for 10 min to solidify the agarose. Ultra-thin sections of agarose-embedded ectosomes were  
532 mounted on 200-mesh copper/rhodium grids, and imaged using a H-7650 transmission EM (Hitachi High  
533 Technologies Corporation, Tokyo, Japan) operating at 80 kV.

### 534 **PreproGATI in HEK-293 cells**

535 HEK-293 cells were maintained in DMEM/F12 medium containing 10% fetal calf serum (Hyclone), 100  
536 units/ml penicillin-streptomycin and 25 mM HEPES, pH 7.4 at 37°C in a 5% CO<sub>2</sub> incubator. A cDNA (2742  
537 bp) encoding preproGATI was synthesized and cloned into pUC57 (GenScript). This cDNA was then  
538 subcloned into pCI-neo (Promega, Madison, WI) and verified by sequencing. Transient transfections were  
539 performed using lipofectamine 3000 (Invitrogen, Thermo Fisher Scientific) and stable populations of HEK-  
540 293 cells expressing preproGATI were generated by selecting cells in DMEM/F12 medium containing 0.5  
541 mg/ml G418 disulfate (KSE Scientific, Durham, NC). For analyzing spent medium, cells were washed with  
542 serum-free medium [DMEM/F-12 medium containing insulin-transferrin-selenium (ITS) (Thermo Fisher  
543 Scientific), 25 mM HEPES, pH 7.4, 100 units/ml penicillin-streptomycin, 1 mg/ml BSA] and then incubated  
544 in serum-free medium at 37°C with 5% CO<sub>2</sub>. Cell lysates were prepared in 1x SDS lysis buffer with 1x  
545 protease inhibitor cocktail (Sigma, # P8340) and 0.3 mg/ml PMSF. Soluble fractions (equal protein) were  
546 analyzed using standard electrophoretic and immunoblotting techniques.

### 547 **HEK-proGATI purification**

548 Stably transfected HEK-293 cells expressing preproGATI (HEK-GATI cells) were washed and cultured in  
549 serum-free media lacking ITS and BSA for 16-18 h. Spent medium was collected and centrifuged at 100 xg

550 to remove cell debris. Protease inhibitor cocktail and 0.3mg/ml PMSF were added to the medium, which  
551 was stored at -80°C. Spent medium pooled from multiple sequential collections was used for purification.  
552 A weak anion exchange column, HiTrap ANX Sepharose FF (Cytiva # 17-5163-01; Sigma), was used to  
553 concentrate the HEK-proGATI (pI = 6.04). Prior to sample loading, the pH of the spent medium was  
554 adjusted to 7.5 and the sample centrifuged at 10,000 xg for 15 min to remove any insoluble material. The  
555 HiTrap ANX Sepharose FF column was washed with water, and equilibrated with 20 mM Tris, pH 7.5  
556 containing 100 mM NaCl and 5% glycerol. The sample was loaded with a peristaltic pump and the flow-  
557 through discarded. The column was washed with 20 mM Tris, pH 7.5 buffer containing 100 mM NaCl and  
558 5% Glycerol until the phenol red from the spent medium was no longer visible. Proteins were then eluted  
559 using an AKTA Purifier 10 FPLC System (GE Healthcare, Fairfield, CT), with a gradient of 100 mM to 1 M  
560 NaCl in 20mM Tris buffer containing 5% glycerol, a flow rate of 1 ml/min and a total elution volume of 40  
561 ml. The collected fractions were analyzed using 4-15% SDS-PAGE gels, immunoblotted and probed with  
562 the C-ter antibody. Peak fractions were pooled and further purified by gel filtration using a Superdex 200  
563 Increase 10/300 GL (GE Healthcare, 28-9909-44) column equilibrated with 20 mM HEPES, pH 7.4  
564 containing 0.5 M NaCl (Fig. S2C). Fractions were pooled based on SDS-PAGE analysis; purified HEK-proGATI  
565 (~5 µg) was then analyzed by mass spectrometry (see below). Approximately 5 mg of HEK-proGATI was  
566 purified from 500 ml of spent medium.

#### 567 **BCS treatment of HEK-GATI cells**

568 HEK-GATI cells plated into 24 well dishes were washed and incubated for 30 min in serum-free media, at  
569 37°C with 5% CO<sub>2</sub>. Cells were then treated with serum-free media containing 50 µM bathocuproine  
570 disulfonic acid (BCS, Sigma) as described by (Bonnemaison et al., 2015). Cells treated with medium only  
571 were used as control. Spent medium was collected and centrifuged at 100 xg to remove cell debris. Cell  
572 lysates (15 µg, ~20% of total) and spent media (15 µl, 5% of total) were fractionated in 4-15% SDS-PAGE  
573 gels and analyzed by immunoblotting.

#### 574 **Antibody generation**

575 Synthetic peptides (BioMatik, Kitchener, Ontario, Canada) from the N-terminal (YELGLDIDGKPAHPAAT-NH<sub>2</sub>,  
576 1.5 mg) and C-terminal (YAPGTGGGATI-NH<sub>2</sub>, 1.5 mg) regions of proGATI were individually conjugated to  
577 keyhole limpet hemocyanin (KLH; 3 mg; Sigma H-7017, Lot 110K4833). An additional Cys residue added to  
578 the N-ter peptide allowed conjugation to KLH using m-maleimidobenzoyl-N-hydroxysuccinimide ester. KLH  
579 conjugation of the C-ter peptide used glutaraldehyde, facilitating the generation of amide specific  
580 antibodies. Three rabbits (CT327, CT330, and CT332) were immunized with a mixture of KLH-conjugated  
581 N-ter and C-ter peptides by Covance Immunology Services (Denver, PA). Crude IgG was obtained by  
582 ammonium sulfate precipitation from the sera of immunized rabbits and N-ter and C-ter antibodies further  
583 purified by peptide affinity chromatography. The N-ter (pI 5.5) and C-ter (pI 9.9) peptides were conjugated  
584 to Affi-Gel-10 (Bio-rad) agarose beads for affinity-purification. Recoveries during affinity purification and  
585 cross-reactivity of purified antibodies were examined using solid phase assays. High-affinity binding 96-  
586 well plates coated with N-ter (5 ng) or C-ter (5 ng) peptide were prepared and serial 3-fold dilutions of each  
587 sample were tested.

#### 588 **Deglycosylation assays**



589 The presence of N-linked oligosaccharides was examined using PNGase F (New England Biolabs (NEB),  
590 Ipswich, MA, # P0708S) and the presence of O-linked sugars was assessed by combined treatment with O-  
591 glycosidase (NEB #P0733S) and  $\alpha$ 2-3,6,8 neuraminidase (NEB #P0720S). Mating *C. reinhardtii* ectosomes  
592 (20  $\mu$ g) and spent medium (9  $\mu$ l) from HEK-293 cells expressing proGATI were denatured by heating at  
593 100°C for 10 min with 1x denaturing buffer. Following denaturation, samples were deglycosylated  
594 following the manufacturer's protocol. Samples incubated on ice only (-) and treated with buffer only (+B)  
595 were used as controls. For mass spectrometry analysis (see below), purified HEK-proGATI (~5  $\mu$ g) was  
596 denatured and deglycosylated using deglycosylation mix II (NEB, #P6044S), which contains the enzymes  
597 needed to remove N-linked and many common O-linked glycans. The deglycosylated sample was buffer  
598 exchanged using Zeba™ spin desalting columns (40K Mol. Wt. cutoff; Thermo Fisher Scientific, #87768).

### 599 Immunoprecipitation

600 Immunoprecipitation was performed using with slight modifications of previous protocols (Miller et al.,  
601 2017). Cross-reactive proteins were immunoprecipitated from *plus* gametic cell lysates and from mating  
602 ectosomes using affinity-purified C-ter antibody. Before immunoprecipitation, samples were denatured.  
603 An equal volume of 1x SDS-P buffer (50 mM Tris pH 7.6, 1% SDS, 130 mM NaCl, 5 mM EDTA, 50 mM NaF,  
604 10 mM NaPP<sub>i</sub>) containing 0.3 mg/ml PMSF, protease inhibitor cocktail and PhosStop (Roche) was added  
605 to the TMT cell lysate (1 mg protein) or mating ectosomes (1 mg protein) and samples were heated at  
606 55°C for 5 min. Samples were allowed to cool and incubated with 0.5 volume (for cell lysate) or 1.0 volume  
607 (for ectosomes) of 15% NP-40 for 20 min on ice. Samples were then diluted with 5 volumes of TES-  
608 mannitol (TM) buffer containing protease inhibitor cocktail, 0.3 mg/ml PMSF and PhosStop. Each sample  
609 was centrifuged at 15,000 xg for 15 min at 4°C to remove any insoluble material. For pre-clearing, washed  
610 Protein A agarose beads (50  $\mu$ l) (Thermo Fisher Scientific, #22810) were added, samples were tumbled for  
611 30 min at 4°C and then centrifuged at 100 xg for 3 min. Affinity-purified C-terminal antibody (100  $\mu$ l) was  
612 then added to the pre-cleared supernatants, followed by Protein A beads (50  $\mu$ l) that had been washed  
613 with 1x TMT buffer containing 1x protease inhibitor cocktail, 0.3 mg/ml PMSF and 1x Phos Stop. After  
614 overnight incubation at 4°C, beads were pelleted and the unbound fraction saved; beads were then  
615 washed once with TMT buffer containing 0.5M NaCl and twice with TM buffer containing protease  
616 inhibitor cocktail, 0.3 mg/ml PMSF and Phos Stop. Bound protein was eluted by boiling in 2x Laemmli  
617 sample buffer (Bio-rad) and particulate material removed by centrifugation at 15,000 xg at room  
618 temperature. The input (15  $\mu$ g) and eluted proteins (~2% of IPT) were fractionated in 4–15 % SDS-PAGE  
619 gels (Bio-rad) and analyzed by immunoblotting. For mass spectrometry, samples were fractionated by  
620 SDS-PAGE and visualized using QC colloidal Coomassie stain (Bio-rad); the 75-kDa band was excised from  
621 the *plus* gamete cell lysate and mating ectosome samples.

### 622 Mass spectrometry

623 Excised gel bands were destained using 40% ethanol and 10% acetic acid in water, equilibrated to pH 8 in  
624 100 mM ammonium bicarbonate, reduced by incubation with 10 mM dithiothreitol in 100 mM ammonium  
625 bicarbonate (1 hr at 37°C) and alkylated by incubation with 55 mM iodoacetamide in 100 mM ammonium  
626 bicarbonate (45 min at 37°C in the dark). Gel bands were dehydrated using acetonitrile, dried, and then  
627 rehydrated in a 12.5 ng/ $\mu$ L trypsin solution (Promega porcine sequencing grade trypsin) in 100 mM  
628 ammonium bicarbonate. Proteolysis proceeded for 16 hr at 37°C. Tryptic peptides were extracted using

629 alternating washes with 100 mM ammonium bicarbonate and 5% formic acid in 50% acetonitrile and a  
630 final wash cycle with 100 mM ammonium bicarbonate and 100% acetonitrile. Peptide solutions were  
631 pooled, dried and peptides resuspended in 0.1% formic acid in water prior to mass spectrometry analysis.

632 Purified HEK-proGATI was diluted with 100 mM ammonium bicarbonate in water and subjected to  
633 reduction and alkylation using 5 mM dithiothreitol in 100 mM ammonium bicarbonate (1.5 hr at 37°C)  
634 and 10 mM iodoacetamide in 100 mM ammonium bicarbonate (45 min at 37°C in the dark), respectively.  
635 Promega sequencing grade trypsin was added (1:20 w/w, enzyme:protein) and proteolysis proceeded for  
636 16 hr at 37°C. Digestion was quenched by addition of concentrated formic acid. Peptides were desalted  
637 using high capacity C<sub>18</sub> desalting spin columns (Pierce #89851; ThermoFisher). Desalted peptides were  
638 dried to completion and resuspended in 0.1% formic acid in water prior to mass spectrometry analysis.

639 Resuspended peptides were analyzed using nanoflow ultra-high performance liquid chromatography  
640 (UPLC) coupled to tandem mass spectrometry (MS/MS) using a Dionex Ultimate 3000 RSLCnano UPLC  
641 system and Q Exactive HF mass spectrometer (ThermoFisher Scientific). Peptides were loaded onto a 75  
642 µm x 25 cm nanoEase m/z Peptide BEH C<sub>18</sub> analytical column (Waters Corporation, Milford, MA),  
643 separated using either a 1 or 2 hr reversed-phase UPLC gradient, and directly ionized into the Q Exactive  
644 HF using positive mode electrospray ionization. MS/MS data were acquired using a data-dependent  
645 Top15 acquisition method. All raw data were searched against the *C. reinhardtii* proteome using the  
646 following variable modifications: Modification set 1 - Met and Pro oxidation, Ser, Thr, and Tyr  
647 phosphorylation, Glu, Asp, peptide C-term amidation, Cys carbamidomethylation, and Asn, Ser, Thr  
648 HexNAcylation, or Modification set 2 - Met and Pro oxidation, Glu, Asp and peptide C-term amidation, Cys  
649 carbamidomethylation, and the following on Pro residues: 1Hyp1Hex0Pent, 1Hyp2Hex0Pent,  
650 1Hyp3Hex0Pent, 1Hyp4Hex0Pent, 1Hyp0Hex1Pent, 1Hyp0Hex2Pent, 1Hyp0Hex3Pent, 1Hyp0Hex4Pent,  
651 1Hyp1Hex1Pent, 1Hyp1Hex2Pent, 1Hyp1Hex3Pent, 1Hyp1Hex3Pent, 1Hyp2Hex0Pent, 1Hyp2Hex1Pent,  
652 1Hyp2Hex2Pent, 1Hyp3Hex1Pent where Hyp = Hydroxyproline, Hex = hexose, Pent = pentose. Trypsin C-  
653 terminal cleavage specificity was set to “semi-specific C-ragged” at “KR” sites to identify C-terminal non-  
654 tryptic proteolysis sites and subsequent C-terminal peptide amidation. Peptide output option was set to  
655 “automatic score cut” to allow 0-5% peptide level FDR filtering and protein FDR was set to 1%. All other  
656 parameters were kept at default settings. Scaffold v4 or v5 (Proteome Software, Inc., Portland, OR) were  
657 used for visualization and further analysis.

658 For comparative proteomics of VLE1 and SUB14, vegetative and gametic cilia were obtained from both  
659 mating types by the dibucaine method (see above). Isolated cilia were separated into membrane/matrix  
660 and axonemal fractions by extraction with 1% IGEPAL CA-630 and differential centrifugation. Samples were  
661 electrophoresed in triplicate using a short SDS-PAGE gel protocol, stained with Coomassie blue and then  
662 subject to tryptic digestion. Tandem MS/MS spectra of purified tryptic peptides were obtained at the  
663 University of Massachusetts Medical School mass spectrometry facility and analyzed using Mascot with a  
664 parent ion tolerance of 10.0 ppm and a fragment tolerance of 0.050 Da. Modifications allowed included  
665 carbamidomethyl on Cys, C-terminal minus Gly plus amide, N-terminal pyroglutamylation, methionine  
666 oxidation, N-terminal acetylation and phosphorylation.

#### 667 **Bioinformatics analysis and structural modeling**

668 The signal peptide was identified using Signal P ([www.cbs.dtu.dk/services/SignalP/](http://www.cbs.dtu.dk/services/SignalP/)) and N-glycosylation  
669 sites were predicted with NetNGlyc ([www.cbs.dtu.dk/services/NetNGlyc/](http://www.cbs.dtu.dk/services/NetNGlyc/)). The structural models for  
670 proGATI and VLE1 were generated using RoseTTAFold (<https://rosetta.bakerlab.org>) (Baek et al., 2021).

671 Structures were displayed using PyMOL (Schrödinger LLC). Structural homologues of individual proGATI  
672 domains were identified using DALI (<http://ekhidna2.biocenter.helsinki.fi/dali/>; (Holm, 2020)).

### 673 **Statistics and quantification**

674 For each experiment, the number of biological replicates is indicated in the Figure Legend. One-way  
675 ANOVAs with Tukey's multiple comparison test and two-way ANOVAs with Bonferroni post-tests were used  
676 to compare the means. Results are represented as mean  $\pm$  SEM or  $\pm$  range as indicated in the Figure Legend.  
677 GraphPad Prism 5 software was used to perform all statistical analyses.

678

### 679 **Acknowledgements**

680 We gratefully acknowledge the quantitative proteomics analysis conducted by Dr. Jeremy L. Balsbaugh,  
681 Director of the Proteomics & Metabolomics Facility, a component of the Center for Open Research  
682 Resources and Equipment at the University of Connecticut. We also thank Maya Yankova for assistance  
683 with electron microscopy, Dr. Miho Sakato-Antoku for preparing vegetative and gametic cilia samples for  
684 mass spectrometry and assistance with chromatography, and Dr. R. Bloodgood (University of Virginia) for  
685 the gift of FMG-1 antibody.

686

### 687 **Funding**

688 This study was supported by National Institutes of Health grants RO1-DK032949 (to BAE), RO1-GM125606  
689 (to SMK and BAE) and R35-GM140631 (to SMK); mass spectrometry of cilia samples was supported by  
690 RO1-GM051293 (to SMK).

691

### 692 **References**

693 **Anvarian, Z., Mykytyn, K., Mukhopadhyay, S., Pedersen, L. B. and Christensen, S. T.** (2019). Cellular  
694 signalling by primary cilia in development, organ function and disease. *Nat Rev Nephrol* **15**, 199-219.  
695 **Baek, M., DiMaio, F., Anishchenko, I., Dauparas, J., Ovchinnikov, S., Lee, G. R., Wang, J., Cong, Q., Kinch,  
696 L. N., Schaeffer, R. D. et al.** (2021). Accurate prediction of protein structures and interactions using a  
697 three-track neural network. *Science* **373**, 871-876.  
698 **Bloodgood, R. A., Woodward, M. P. and Salomonsky, N. L.** (1986). Redistribution and shedding of flagellar  
699 membrane glycoproteins visualized using an anti-carbohydrate monoclonal antibody and concanavalin A.  
700 *J Cell Biol* **102**, 1797-812.  
701 **Bollig, K., Lamshöft, M., Schweimer, K., Marner, F.-J., Budzikiewicz, H. and Waffenschmidt, S.** (2007).  
702 Structural analysis of linear hydroxyproline-bound O-glycans of *Chlamydomonas reinhardtii* —  
703 conservation of the inner core in *Chlamydomonas* and land plants. *Carbohydrate Res* **342**, 2557-2566.  
704 **Bonnemaison, M. L., Bäck, N., Duffy, M. E., Ralle, M., Mains, R. E. and Eipper, B. A.** (2015). Adaptor  
705 Protein-1 Complex Affects the Endocytic Trafficking and Function of Peptidylglycine  $\alpha$ -Amidating  
706 Monooxygenase, a Luminal Cuproenzyme. *J Biol Chem* **290**, 21264-79.  
707 **Cao, M., Ning, J., Hernandez-Lara, C. I., Belzile, O., Wang, Q., Dutcher, S. K., Liu, Y. and Snell, W. J.** (2015).  
708 Uni-directional ciliary membrane protein trafficking by a cytoplasmic retrograde IFT motor and ciliary  
709 ectosome shedding. *eLife* **4**, e05242.

- 710 **Carvalho-Santos, Z., Azimzadeh, J., Pereira-Leal, J. B. and Bettencourt-Dias, M.** (2011). Tracing the origins  
711 of centrioles, cilia, and flagella. *J Cell Biol* **195**, 341-341.
- 712 **Ding, K., Han, Y., Seid, T. W., Buser, C., Karigo, T., Zhang, S., Dickman, D. K. and Anderson, D. J.** (2019).  
713 Imaging neuropeptide release at synapses with a genetically engineered reporter. *eLife* **8**, e46421.
- 714 **Drucker, D. J.** (2018). Mechanisms of Action and Therapeutic Application of Glucagon-like Peptide-1. *Cell*  
715 *Metab* **27**, 740-756.
- 716 **Fukada, K., Inoue, T. and Shiraishi, H.** (2006). A posttranslationally regulated protease, VheA, is involved  
717 in the liberation of juveniles from parental spheroids in *Volvox carteri*. *Plant Cell* **18**, 2554-66.
- 718 **Glembotski, C. C., Dixon, J. E. and Gibson, T. R.** (1988). Secretion of atrial natriuretic factor-(1-98) by  
719 primary cardiac myocytes. *J Biol Chem* **263**, 16073-81.
- 720 **Green, J. A., Schmid, C. L., Bley, E., Monsma, P. C., Brown, A., Bohn, L. M. and Mykytyn, K.** (2016).  
721 Recruitment of  $\beta$ -Arrestin into Neuronal Cilia Modulates Somatostatin Receptor Subtype 3 Ciliary  
722 Localization. *Mol Cell Biol* **36**, 223-235.
- 723 **Halban, P. A.** (1991). Structural domains and molecular lifestyles of insulin and its precursors in the  
724 pancreatic Beta cell. *Diabetologia* **34**, 767-778.
- 725 **Harris, E.** (2009). The *Chlamydomonas* Sourcebook. San Diego: Elsevier.
- 726 **Holm, L.** (2020). Using Dali for Protein Structure Comparison. *Methods Mol Biol* **2112**, 29-42.
- 727 **Huang, K., Kunkel, T. and Beck, C. F.** (2004). Localization of the Blue-Light Receptor Phototropin to the  
728 Flagella of the Green Alga *Chlamydomonas reinhardtii*. *Mol Biol Cell* **15**, 3605-3614.
- 729 **Hughes, J. W., Cho, J. H., Conway, H. E., DiGruccio, M. R., Ng, X. W., Roseman, H. F., Abreu, D., Urano, F.**  
730 **and Piston, D. W.** (2020). Primary cilia control glucose homeostasis via islet paracrine interactions. *Proc*  
731 *Natl Acad Sci USA* **117**, 8912-8923.
- 732 **Joshi, H. J., Narimatsu, Y., Schjoldager, K. T., Tytgat, H. L. P., Aebi, M., Clausen, H. and Halim, A.** (2018).  
733 SnapShot: O-Glycosylation Pathways across Kingdoms. *Cell* **172**, 632-632.e2.
- 734 **Kawaharada, Y., Kelly, S., Nielsen, M. W., Hjuler, C. T., Gysel, K., Muszyński, A., Carlson, R. W., Thygesen,**  
735 **M. B., Sandal, N., Asmussen, M. H. et al.** (2015). Receptor-mediated exopolysaccharide perception  
736 controls bacterial infection. *Nature* **523**, 308-12.
- 737 **King, S. M.** (1995). Large-scale isolation of *Chlamydomonas* flagella. *Methods Cell Biol* **47**, 9-12.
- 738 **Kinoshita, T., Fukuzawa, H., Shimada, T., Saito, T. and Matsuda, Y.** (1992). Primary structure and  
739 expression of a gamete lytic enzyme in *Chlamydomonas reinhardtii*: similarity of functional domains to  
740 matrix metalloproteases. *Proc Natl Acad Sci USA* **89**, 4693-7.
- 741 **Kubo, T., Kaida, S., Abe, J., Saito, T., Fukuzawa, H. and Matsuda, Y.** (2009). The *Chlamydomonas* hatching  
742 enzyme, sporangin, is expressed in specific phases of the cell cycle and is localized to the flagella of  
743 daughter cells within the sporangial cell wall. *Plant Cell Physiol* **50**, 572-83.
- 744 **Kumar, D., Blaby-Haas, C. E., Merchant, S. S., Mains, R. E., King, S. M. and Eipper, B. A.** (2016a). Early  
745 eukaryotic origins for cilia-associated bioactive peptide-amidating activity. *J Cell Sci* **129**, 943-56.
- 746 **Kumar, D., Mains, R. E. and Eipper, B. A.** (2016b). 60 years of POMC: From POMC and  $\alpha$ -MSH to PAM,  
747 molecular oxygen, copper, and vitamin C. *J Mol Endocrinol* **56**, T63-76.
- 748 **Kumar, D., Mains, R. E., Eipper, B. A. and King, S. M.** (2019). Ciliary and cytoskeletal functions of an  
749 ancient monooxygenase essential for bioactive amidated peptide synthesis. *Cell Mol Life Sci* **76**, 2329-  
750 2348.
- 751 **Kumar, D., Strenkert, D., Patel-King, R. S., Leonard, M. T., Merchant, S. S., Mains, R. E., King, S. M.,**  
752 **Eipper, B. A.** (2017). A bioactive peptide amidating enzyme is required for ciliogenesis. *eLife* **6**, e25728.
- 753 **Kumar, D., Thomason, R. T., Yankova, M., Gitlin, J. D., Mains, R. E., Eipper, B. A. and King, S. M.** (2018).  
754 Microvillar and ciliary defects in zebrafish lacking an actin-binding bioactive peptide amidating enzyme.  
755 *Scientific Rep* **8**, 4547.
- 756 **Long, H. and Huang, K.** (2020). Transport of Ciliary Membrane Proteins. *Frontiers Cell Dev Biol* **7**.

- 757 **Long, H., Zhang, F., Xu, N., Liu, G., Diener, D. R., Rosenbaum, J. L. and Huang, K.** (2016). Comparative  
758 Analysis of Ciliary Membranes and Ectosomes. *Curr Biol* **26**, 3327-3335.
- 759 **Lopez-Moya, F., Suarez-Fernandez, M. and Lopez-Llorca, L. V.** (2019). Molecular Mechanisms of Chitosan  
760 Interactions with Fungi and Plants. *Int J Mol Sci* **20**.
- 761 **Luxmi, R., Blaby-Haas, C., Kumar, D., Rauniyar, N., King, S. M., Mains, R. E. and Eipper, B. A.** (2018).  
762 Proteases Shape the Chlamydomonas Secretome: Comparison to Classical Neuropeptide Processing  
763 Machinery. *Proteomes* **6**, 36.
- 764 **Luxmi, R., Kumar, D., Mains, R. E., King, S. M. and Eipper, B. A.** (2019). Cilia-based peptidergic signaling.  
765 *PLoS Biol* **17**, e3000566.
- 766 **Luxmi, R., Mains, R. E., King, S. M. and Eipper, B. A.** (2021). Peptidylglycine  $\alpha$ -Amidating Monooxygenase  
767 (PAM). In *Encyclopedia of Biological Chemistry III (Third Edition)*, (ed. J. Jez), pp. 88-104. Oxford: Elsevier.
- 768 **Malicki, J. J. and Johnson, C. A.** (2017). The cilium: cellular antenna and central processing unit. *Trends*  
769 *Cell Biol* **27**, 126-140.
- 770 **Marshall, W. and Basto, R.** (2017). Cilia. Cold Spring Harbor, NY: Cold Spring Harbor Laboratory Press.
- 771 **Mathieu-Rivet, E., Mati-Baouche, N., Walet-Balieu, M.-L., Lerouge, P. and Bardor, M.** (2020). N- and O-  
772 Glycosylation Pathways in the Microalgae Polyphyletic Group. *Frontiers Plant Sci* **11**, 609993-609993.
- 773 **Matsubayashi, Y.** (2011). Post-Translational Modifications in Secreted Peptide Hormones in Plants. *Plant*  
774 *Cell Physiol* **52**, 5-13.
- 775 **Matsuda, Y., Koseki, M., Shimada, T. and Saito, T.** (1995). Purification and Characterization of a  
776 Vegetative Lytic Enzyme Responsible for Liberation of Daughter Cells during the Proliferation of  
777 *Chlamydomonas reinhardtii*. *Plant Cell Physiol* **36**, 681-689.
- 778 **Miller, M. B., Yan, Y., Machida, K., Kiraly, D. D., Levy, A. D., Wu, Y. I., Lam, T. T., Abbott, T., Koleske, A.**  
779 **J., Eipper, B. A. et al.** (2017). Brain Region and Isoform-Specific Phosphorylation Alters Kalirin SH2 Domain  
780 Interaction Sites and Calpain Sensitivity. *ACS Chem Neurosci* **8**, 1554-1569.
- 781 **Nachury, M. V. and Mick, D. U.** (2019). Establishing and regulating the composition of cilia for signal  
782 transduction. *Nat Rev Mol Cell Biol* **20**, 389-405.
- 783 **Palma, M. S.** (2006). Insect Venom Peptides. In *Handbook of Biologically Active Peptides*, (ed. A. J. Kastin),  
784 pp. 389-396. Burlington: Academic Press.
- 785 **Ranjan, P., Awasthi, M. and Snell, W. J.** (2019). Transient Internalization and Microtubule-Dependent  
786 Trafficking of a Ciliary Signaling Receptor from the Plasma Membrane to the Cilium. *Curr Biol* **29**, 2942-  
787 2947.e2.
- 788 **Reiter, J. F. and Leroux, M. R.** (2017). Genes and molecular pathways underpinning ciliopathies. *Nat Rev*  
789 *Mol Cell Biol* **18**, 533-547.
- 790 **Rowe, M. L. and Elphick, M. R.** (2012). The neuropeptide transcriptome of a model echinoderm, the sea  
791 urchin *Strongylocentrotus purpuratus*. *Gen Comp Endocrinol* **179**, 331-44.
- 792 **Sasso, S., Stibor, H., Mittag, M. and Grossman, A. R.** (2018). From molecular manipulation of  
793 domesticated *Chlamydomonas reinhardtii* to survival in nature. *eLife* **7**, e39233.
- 794 **Schulze, S., Oltmanns, A., Machnik, N., Liu, G., Xu, N., Jarmatz, N., Scholz, M., Sugimoto, K., Fufezan, C.,**  
795 **Huang, K. et al.** (2017). N-Glycoproteomic Characterization of Mannosidase and Xylosyltransferase  
796 Mutant Strains of *Chlamydomonas reinhardtii*. *Plant Physiol* **176**, 1952-1964.
- 797 **Shakya, M. and Lindberg, I.** (2020). Mouse Models of Human Proprotein Convertase Insufficiency.  
798 *Endocrine Rev* **42**, 259-294.
- 799 **Szabó, R., Láng, O., Láng, J., Illyés, E., Kóhidai, L. and Hudecz, F.** (2015). Effect of SXWS/WSXWS peptides  
800 on chemotaxis and adhesion of the macrophage-like cell line J774. *J Mol Recognition* **28**, 253-260.
- 801 **Takahashi, T., Muneoka, Y., Lohmann, J., Lopez de Haro, M. S., Solleder, G., Bosch, T. C., David, C. N.,**  
802 **Bode, H. R., Koizumi, O., Shimizu, H. et al.** (1997). Systematic isolation of peptide signal molecules  
803 regulating development in hydra: LWamide and PW families. *Proc Natl Acad Sci USA* **94**, 1241-6.

804 **Takao, D. and Verhey, K. J.** (2016). Gated entry into the ciliary compartment. *Cellular and molecular life*  
805 *sciences : Cell Mol Life Sci* **73**, 119-127.

806 **Tan, L., Leykam, J. F. and Kieliszewski, M. J.** (2003). Glycosylation motifs that direct arabinogalactan  
807 addition to arabinogalactan-proteins. *Plant Physiol* **132**, 1362-9.

808 **van Dam, T. J. P., Kennedy, J., van der Lee, R., de Vrieze, E., Wunderlich, K. A., Rix, S., Dougherty, G. W.,**  
809 **Lambacher, N. J., Li, C., Jensen, V. L. et al.** (2019). CiliaCarta: An integrated and validated compendium of  
810 ciliary genes. *PLoS One* **14**, e0216705.

811 **Voigt, J., Woestemeyer, J. and Frank, R.** (2007). The Chaotrope-soluble Glycoprotein GP2 Is a Precursor  
812 of the Insoluble Glycoprotein Framework of the *Chlamydomonas* Cell Wall\*. *J Biol Chem* **282**, 30381-  
813 30392.

814 **Wang, J., Silva, M., Haas, Leonard A., Morsci, Natalia S., Nguyen, Ken C. Q., Hall, David H. and Barr,**  
815 **Maureen M.** (2014). *C. elegans* Ciliated Sensory Neurons Release Extracellular Vesicles that Function in  
816 Animal Communication. *Curr Biol* **24**, 519-525.

817 **Wang, Y., Bernard, A., Comblain, F., Yue, X., Paillart, C., Zhang, S., Reiter, J. F. and Vaisse, C.** (2021).  
818 Melanocortin 4 receptor signals at the neuronal primary cilium to control food intake and body weight. *J*  
819 *Clin Invest* **131**.

820 **Witman, G. B.** (1986). Isolation of *Chlamydomonas* flagella and flagellar axonemes. *Methods Enzymol* **134**,  
821 280-290.

822 **Wong, J., Gysel, K., Birkefeldt, T. G., Vinther, M., Muszyński, A., Azadi, P., Laursen, N. S., Sullivan, J. T.,**  
823 **Ronson, C. W., Stougaard, J. et al.** (2020). Structural signatures in EPR3 define a unique class of plant  
824 carbohydrate receptors. *Nat Commun* **11**, 3797.

825 **Wood, C. R., Huang, K., Diener, D. R. and Rosenbaum, J. L.** (2013). The cilium secretes bioactive  
826 ectosomes. *Curr Biol* **23**, 906-911.

827 **Wu, C. T., Hilgendorf, K. I., Bevacqua, R. J., Hang, Y., Demeter, J., Kim, S. K. and Jackson, P. K.** (2021).  
828 Discovery of ciliary G protein-coupled receptors regulating pancreatic islet insulin and glucagon secretion.  
829 *Genes Dev* **35**, 1243-1255.

830 **Xu, N., Oltmanns, A., Zhao, L., Girot, A., Karimi, M., Hoepfner, L., Kelterborn, S., Scholz, M., Beißel, J.,**  
831 **Hegemann, P. et al.** (2020). Altered N-glycan composition impacts flagella-mediated adhesion in  
832 *Chlamydomonas reinhardtii*. *eLife* **9**, e58805.

833 **Yasuda, A., Jones, L. and Shigeri, Y.** (2013). The Multiplicity of Post-Translational Modifications in Pro-  
834 Opiomelanocortin-Derived Peptides. *Frontiers Endocrinol* **4**, 186.

835

836

837

838

839

840

841

842

843

844

845

846 **Figures**

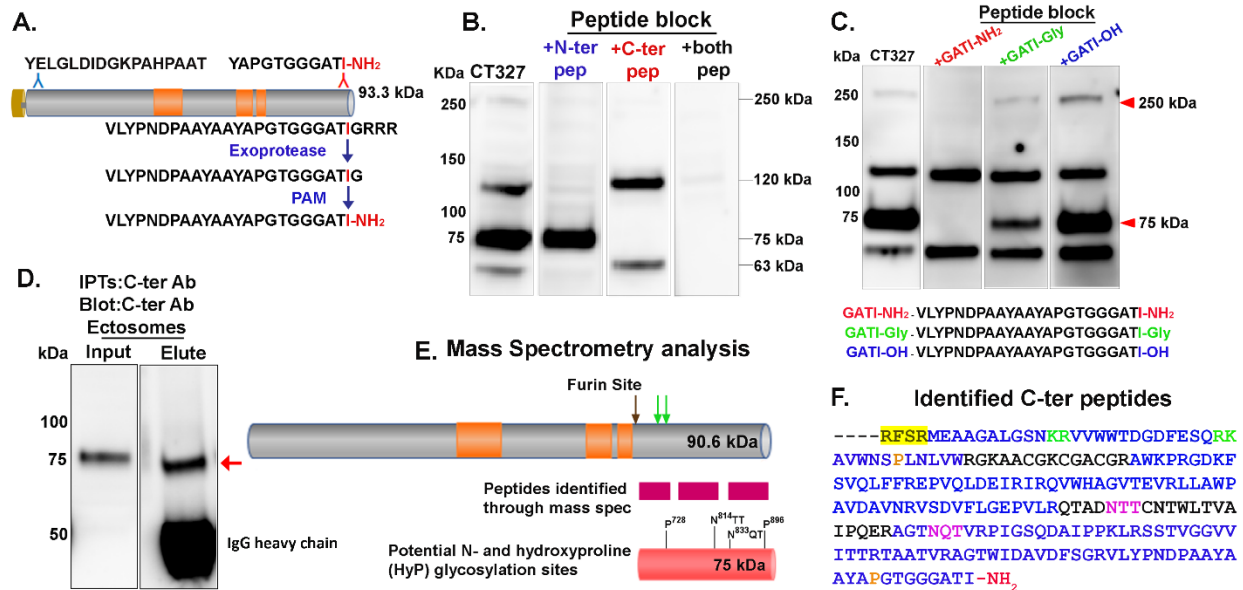

848 **Figure 1. Cre03.g204500 in mating ectosomes.** **A.** Diagram shows Cre03.g204500 (preproGATI) and the  
 849 N-terminal and C-terminal peptides used as antigens and for peptide blocking. The Pro-rich regions are in  
 850 orange. The pathway leading to C-terminal amidation is illustrated. **B.** Mating ectosomes (10 μg protein)  
 851 isolated from 1 h mixed gametes were fractionated by SDS-PAGE, blotted and incubated with antiserum  
 852 (CT327) alone or following pre-incubation with the N-ter (blue), C-ter (red) or mixture of both (black)  
 853 antigenic peptides. Approximate molecular masses are shown. Data are representative of three  
 854 independent experiments. **C.** The proGATI antibody generated is amidation specific. Immunoblot of  
 855 mating ectosomes (10 μg/lane) probed with CT327 antiserum pre-incubated with peptides having -NH<sub>2</sub>  
 856 (GATI-amide), -Gly (GATI-Gly) or -OH (GATI-OH) at the C-terminus. Red arrowheads indicate that the  
 857 signals for the 250-kDa and 75-kDa bands are almost completely blocked by GATI-NH<sub>2</sub> peptide, attenuated  
 858 by GATI-Gly and unaffected by GATI-OH. Similar results were obtained in two independent experiments.  
 859 **D.** Immunoprecipitation from mating ectosomes with affinity-purified C-ter antibody. The excised 75-kDa  
 860 fragment (red arrow) was analyzed by mass spectrometry. **E.** The location of peptides identified by mass  
 861 spectrometry is indicated (pink boxes). A furin-like cleavage site (black arrow) precedes the most N-  
 862 terminally located peptide identified; potential paired basic cleavage sites (green) and predicted N-  
 863 glycosylation and O-glycosylation sites are indicated. **F.** The C-terminal sequence of proGATI is shown.  
 864 Peptides identified by mass spectrometry are in blue. The furin-like cleavage site (yellow highlight), paired  
 865 basic residues (green), predicted N-glycosylation sites (pink), predicted O-glycosylation sites (Pro residues  
 866 subject to hydroxylation; orange) and amidated C-terminus (red) are indicated.

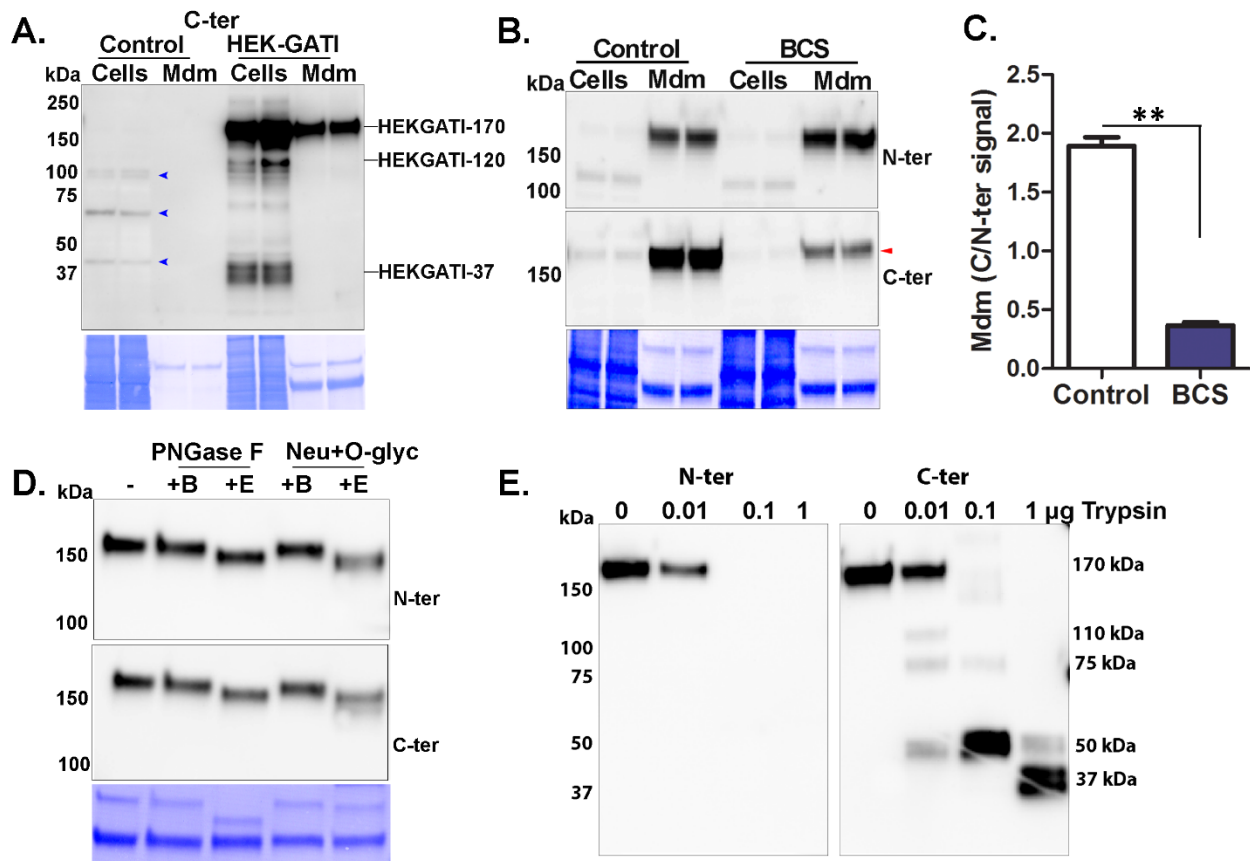

869 **Figure 2. Expression of proGATI in HEK-293 cells.** **A.** Immunoblot of cell extracts (Cells; 20 µg protein,  
870 approximately 10 % of total) and spent medium (Mdm; 1% of total collected over an 18 h period) of  
871 Control (non-transfected) and HEK-293 cells expressing preproGATI probed with affinity-purified C-ter  
872 antibody. A 170 kDa (HEK-proGATI) band was detected in both cells and spent medium while 120 kDa and  
873 37 kDa bands were detected only in cells (and see Fig. S2A). Non-specific bands identified in Controls are  
874 marked (blue arrow). Secretion rate and cell content are quantified in Fig. S2B. **B.** Analysis of C-terminal  
875 amidation of HEK-proGATI. Spent medium (5%) and cell lysates (15 µg, ~20% of total) of BCS-treated cells  
876 and their respective Controls were analyzed. The C-ter signal for HEK-proGATI was reduced following BCS  
877 treatment (red arrow), whereas the N-ter signal was unaffected. **C.** The C-ter/N-ter signal ratio for HEK-  
878 GATI-170 was reduced following BCS treatment. Results are the average of duplicates, where \*\*P<0.001.  
879 **D.** HEK-proGATI spent medium (10 µl) was digested with PNGase F or with a mixture of O-glycosidase and  
880 neuraminidase (Neu+O-glyc); no treatment (-), incubated in buffer alone (+B), or buffer with enzyme (+E).  
881 Reductions in the apparent molecular mass of secreted HEK-GATI-170 of ~15-20 kDa were observed.  
882 Similar results were obtained in three independent experiments. **E.** Tryptic digestion of HEK-GATI in spent  
883 medium (10 µl); samples were fractionated by SDS-PAGE and probed with N-ter and C-ter antibodies. The  
884 N-ter antigenic site contains a single Lys residue and is destroyed by trypsin treatment. The C-ter antibody  
885 detected the indicated tryptic products. The results were duplicated in independent experiments.

886



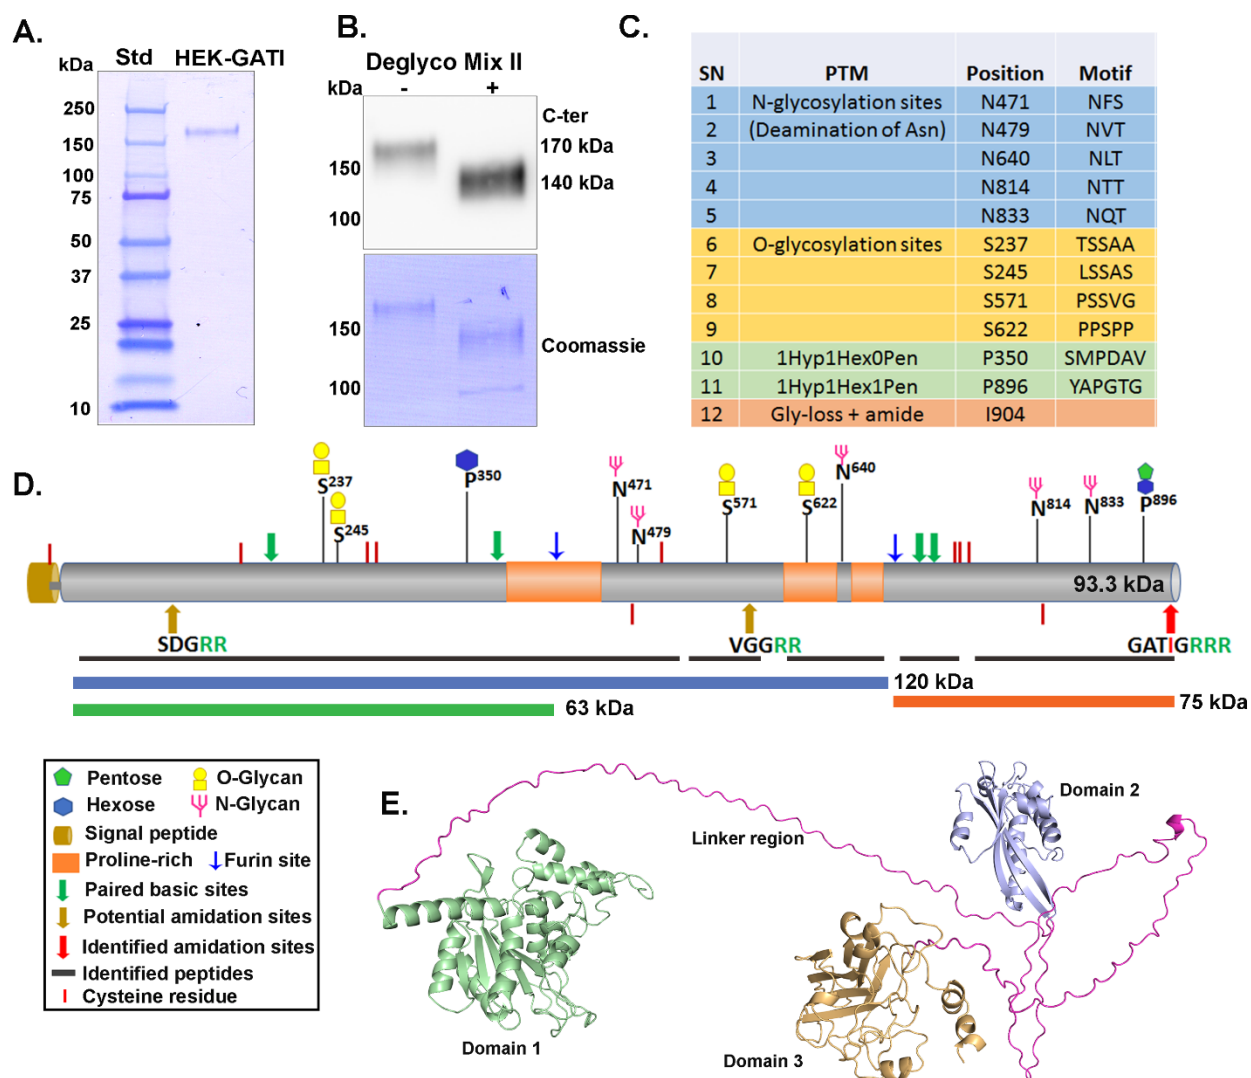

888 **Figure 3. Mass spectrometry analysis of purified HEK-GATI-170.** **A.** SDS-PAGE of purified HEK-proGATI  
889 (see Fig. S2C); Coomassie-stained PVDF membrane is shown. **B.** Digestion of purified HEK-proGATI with  
890 protein deglycosylation mix II reduced its apparent molecular mass. **C.** Glycosylation sites identified; N-  
891 glycosylation sites were identified in deglycosylated-HEK-proGATI, while O-glycosylation sites were  
892 identified in purified native protein. **D.** Schematic diagram of preproGATI illustrating the N- and O-  
893 glycosylation sites identified in purified HEK-proGATI. The predicted products resulting from cleavage at  
894 the furin-like sites are indicated. **E.** The structural model of proGATI generated using RoseTTAFold (Baek  
895 et al., 2021) contains three well-folded domains (domain 1, residues 51-370, green; domain 2, residues  
896 446-593, blue; domain 3, residues 696-908, orange) connected by long, highly flexible, Pro-rich linkers  
897 (pink). Although individual domains are well structured, their relative orientation with respect to each  
898 other is variable.

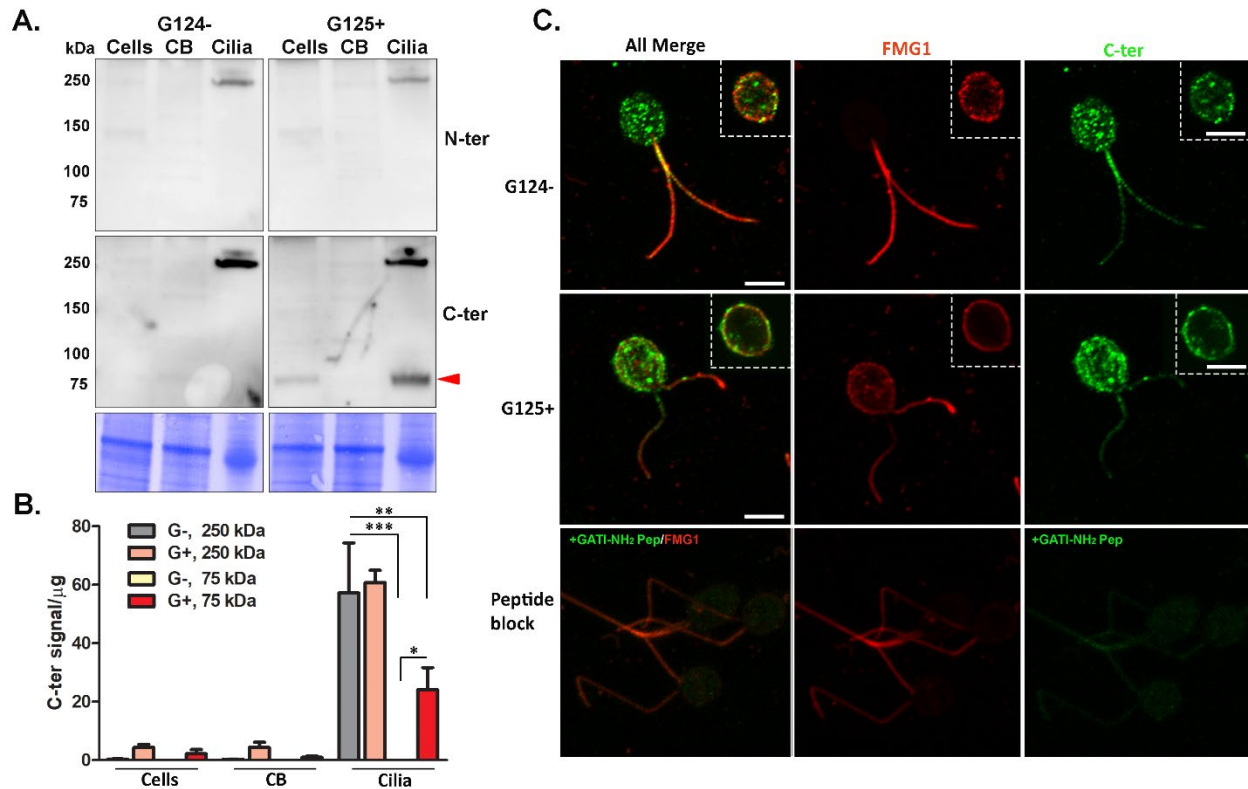

900 **Figure 4. Processing and localization of proGATI in *minus* and *plus* gametes.** **A.** Immunoblot of cells,  
 901 deciliated cell bodies and cilia of *minus* (G124-) and *plus* (G125+) resting gametes using affinity-purified  
 902 proGATI N-ter and C-ter antibodies. Equal amounts of protein (20  $\mu$ g) were loaded. **B.** Quantification of  
 903 the C-ter signal for proGATI revealed significant enrichment of 250-kDa and 75-kDa bands in cilia but not  
 904 in cell bodies (CB). Results are the average of duplicates. Means were compared with  $\pm$  range. Asterisks  
 905 indicate significant differences between groups \* $P < 0.05$ , \*\* $P < 0.01$ , \*\*\* $P < 0.001$ . **C.** Maximal projection  
 906 confocal images of *minus* and *plus* resting gametes stained with the C-ter proGATI antibody (green) and  
 907 antibody to FMG1 (red). Inset images show single Z-planes. *Plus* gametes probed with antibody pre-  
 908 incubated with the GATI-NH<sub>2</sub> peptide exhibit reduced staining (green) in cell bodies and cilia. Similar  
 909 localization of proGATI in gametes was obtained in three independent experiments. Scale bar = 5  $\mu$ m.

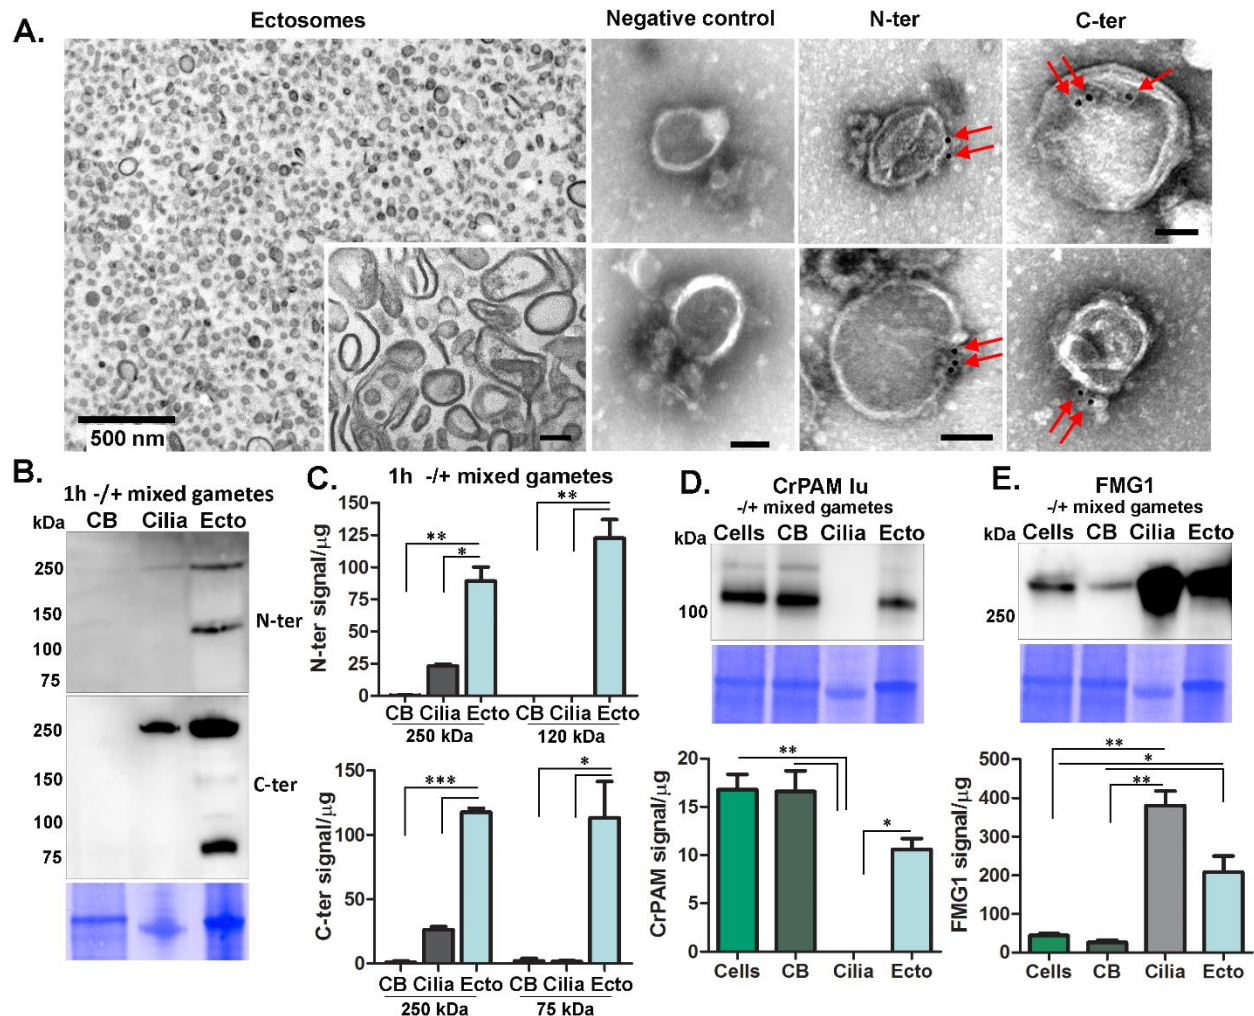

911 **Figure 5. ProGATI in mating ectosomes.** **A.** A cross-section transmission electron micrograph of an  
 912 agarose embedded ectosome pellet isolated from 1 h +/- mixed gametes is shown. The inset shows a  
 913 higher magnification image of ectosomes that had been treated with Na<sub>2</sub>CO<sub>3</sub> to remove peripheral  
 914 membrane proteins; scale bar = 100 nm. The right panels show immuno-gold-EM negative stain images  
 915 of intact ectosomes incubated with affinity-purified N-ter or C-ter antibodies and a gold-tagged secondary  
 916 antibody; both epitopes localized to the ectosomal surface. Ectosomes incubated with gold-tagged  
 917 secondary anti-rabbit antibody alone served as a negative control; scale bars = 500 nm (main image) and  
 918 100 nm (inset). Images are representative of three independent experiments. **B.** The deciliated cell bodies  
 919 (CB), cilia and ectosomes (Ecto) isolated from mixed gametes were fractionated by SDS-PAGE, blotted and  
 920 probed with the N-ter and C-ter antibodies against proGATI. **C.** Graph showing the enrichment of N-ter  
 921 and C-ter signals for proGATI and its fragments in ectosomes. Results are the average of two independent  
 922 experiments; mean is ± range. Asterisks indicate a statistically significant difference between two groups  
 923 (\*P < 0.05, \*\*P < 0.001, \*\*\*P < 0.0001). **D & E.** Immunoblot analysis showing CrPAM and FMG1 levels in  
 924 cells, cell bodies, cilia and ectosomes isolated from mixed gametes. Quantification of CrPAM and FMG1  
 925 protein levels is shown in the graphs. Results are average of duplicates and error bars indicate the ± range  
 926 (where \*P < 0.05, \*\*P < 0.001).

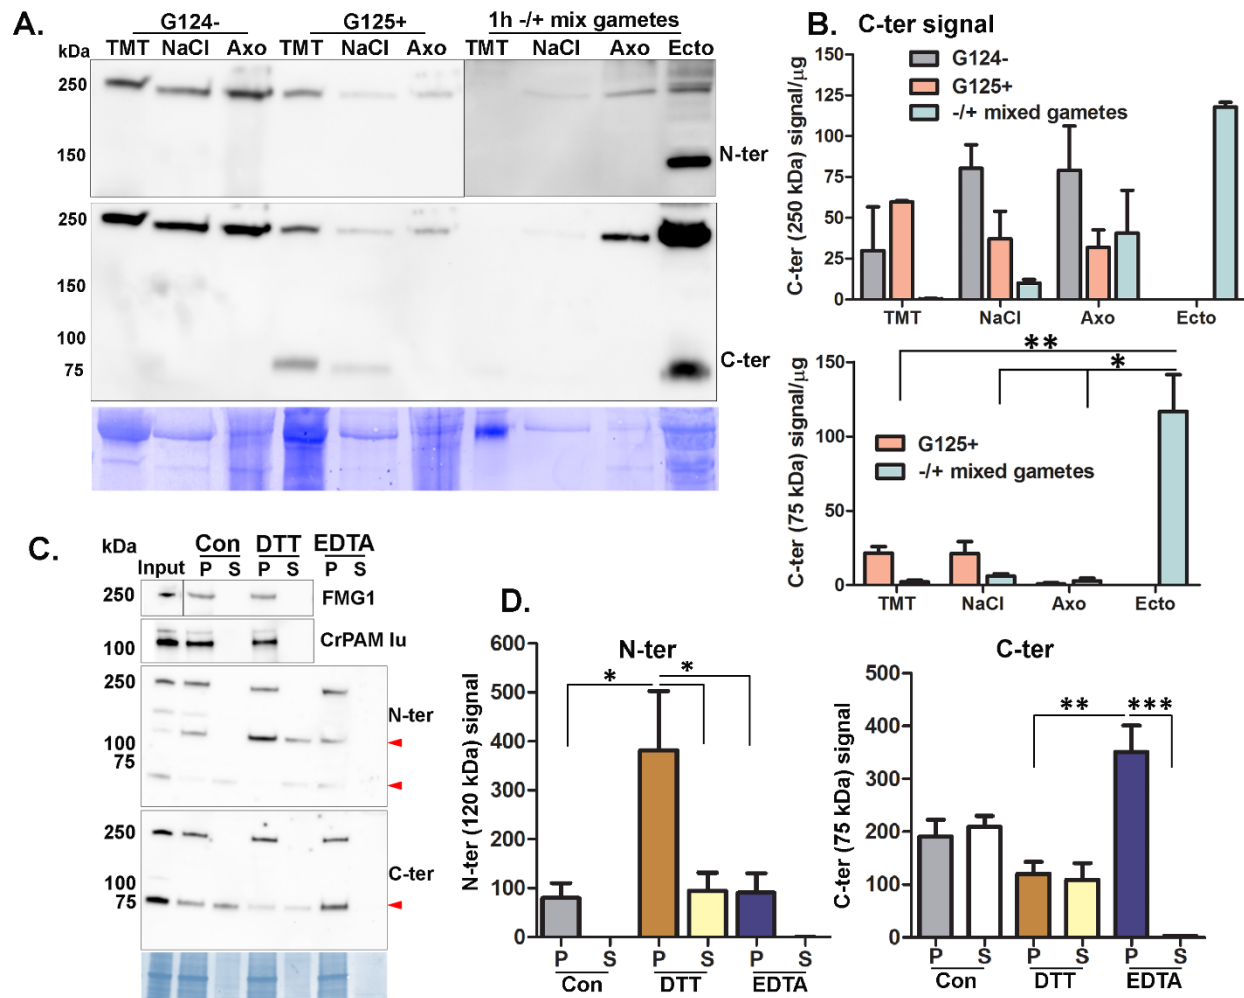

928 **Figure 6. Ciliary localization and association of proGATI and its fragments with ectosomes.** A. Cilia were  
 929 sequentially treated with buffers containing 1% Triton X-100 (TMT) and 0.6 M NaCl (NaCl); the resulting  
 930 axonemal pellet (Axo) was solubilized in 1% SDS-buffer. The sub-ciliary fractions from resting *minus* (G124-  
 931 ) and *plus* (G125+) gametes mixed gametes and mating ectosomes (Ecto) were fractionated by SDS-PAGE,  
 932 blotted and probed with affinity-purified N-ter and C-ter antibodies. Equal amounts of protein (20 μg)  
 933 were loaded for each sample. B. Immunoblot quantification of the 250-kDa and 75-kDa C-ter products.  
 934 Means are average of duplicates and error bars indicate ± range, where \*P<0.05, \*\*P<0.01. C. Freshly  
 935 isolated mating ectosomes (Input) were washed with buffer alone (10 mM HEPES, control) or with buffer  
 936 containing 10 mM dithiothreitol (DTT) or 10 mM EDTA; after centrifugation, the resulting supernatants (S)  
 937 and pellets (P) were analyzed for the presence of proGATI (using N-ter and C-ter antibodies), PAM and  
 938 FMG1. Red arrowheads mark the 120-kDa, 75-kDa and 63-kDa bands. Samples loaded represent the  
 939 pellets and corresponding supernatants derived from an initial 15 μg of ectosomes. D. Quantification of  
 940 120-kDa N-ter signal (n = 4) and 75-kDa C-ter signal (n = 3); means ± SEM are shown. Asterisks indicate  
 941 significant differences between the groups, \*P<0.05, \*\*P<0.01, \*\*\*P<0.001.

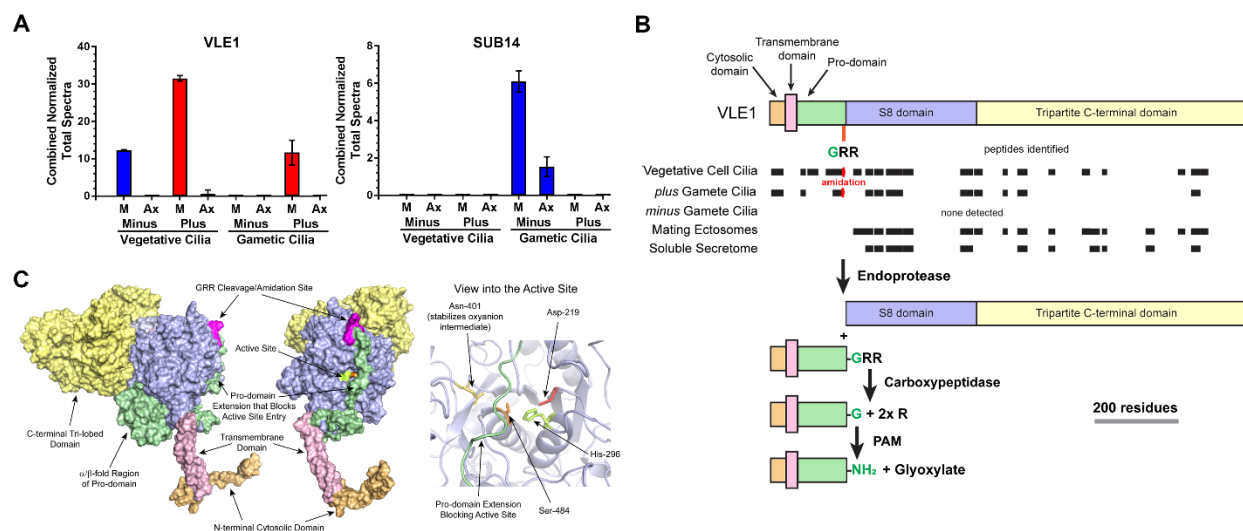

943 **Figure 7. Ciliary distribution and processing of subtilisin-like proteases.** **A.** Normalized total spectral  
 944 counts of VLE1 and SUB14 in the ciliary membrane/matrix (M) and axonemal (Ax) fractions from *minus*  
 945 and *plus* vegetative and gametic cilia (mean  $\pm$  SEM; n=3). **B.** Diagram showing the cytosolic (light orange),  
 946 transmembrane (pink), pro- (green), S8 (purple) and C-terminal (yellow) domains of VLE1. The VLE1  
 947 peptides identified in the cilia of vegetative cells, *plus* and *minus* gametes and in mating ectosome and  
 948 the soluble secretome are indicated by black boxes. The cleavage/amidation site (GRR) that immediately  
 949 precedes the S8 catalytic domain is indicated. The processing pathway proposed for VLE1 is shown. The  
 950  $\alpha$ -amidated peptide (K)APTDTDPTAASSSS-NH<sub>2</sub> produced by cleavage and amidation was found in both  
 951 vegetative and *plus* gamete cilia. **C.** Two views of the molecular surface of a structural model for VLE1  
 952 calculated using RoseTTAFold are shown. The protein consists of a short N-terminal cytosolic domain  
 953 (light orange), a single transmembrane region (pink), an unusual pro-domain (green), the catalytic S8  
 954 domain (blue), and a large C-terminal domain (yellow) that has a tri-partite organization with each lobe  
 955 consisting of two anti-parallel  $\beta$  sheets which exhibit considerable structural similarity to the CEA1 N-  
 956 acetylglucosamine-binding adhesin from the methylotrophic yeast *Komagataella pastoris* (z score = 11.8,  
 957 RMSD = 4.0 Å; 5A3L). The cleavage/amidation site is indicated in magenta. The right-hand panel shows a  
 958 ribbon diagram of the active site. Side chains of the catalytic triad residues and the Asn that stabilizes the  
 959 transition state are shown. The pro-domain strand that arches across the active site is indicated in green.

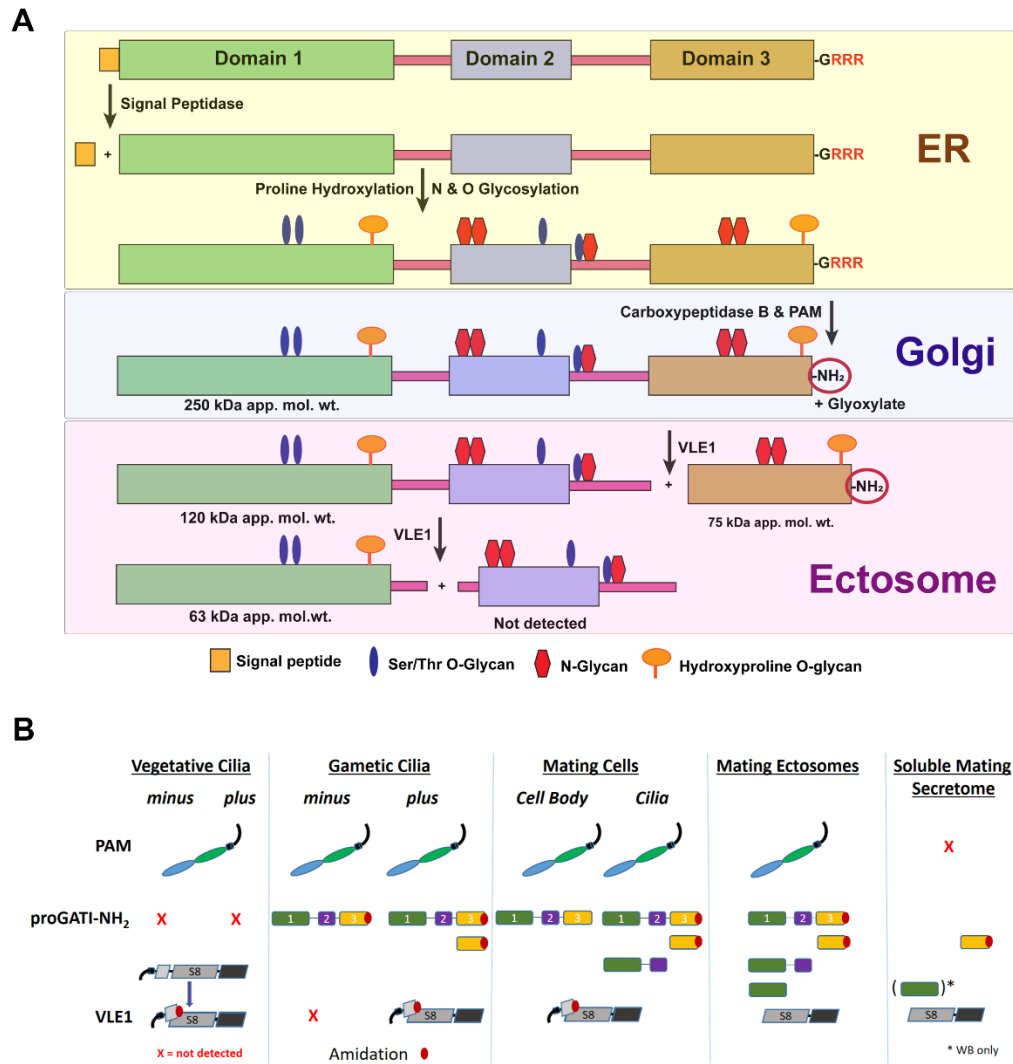

961 **Figure 8. ProGATI processing pathway.** **A.** Diagram illustrating the processing pathway of preproGATI that  
 962 occurs as it traffics through the ER and Golgi and subsequently enters cilia and ectosomes. As preproGATI  
 963 enters the ER, its signal peptide (orange box) is removed by signal peptidase. The addition of N-linked  
 964 sugars (red) begins in the ER, as does modification of Pro to HyP by prolyl hydroxylases. As proGATI moves  
 965 into the Golgi complex, more complex sugars and O-linked sugars on HyP (orange) and Ser/Thr (blue)  
 966 residues are added, leading to the higher apparent molecular mass (~250 kDa) of proGATI. A  
 967 carboxypeptidase trims the three C-terminal Arg residues and generates a substrate for PAM. PAM  
 968 converts the –Gly extended substrate into the amidated product (GATI-NH<sub>2</sub>) in a two-step reaction and  
 969 releases glyoxylate as a byproduct. This 250-kDa amidated proGATI form is then moved to the ciliary  
 970 membrane. Once on cilia, or as it moves from cilia into nascent ectosomes, 250-kDa proGATI is cleaved  
 971 by a subtilisin-like endoprotease (predicted to be VLE1) to yield the 120-kDa N-terminal region, and the  
 972 amidated 75-kDa C-terminal fragment. Cleavage of the 120-kDa product at either a second furin-like  
 973 cleavage site located in the linker between domains 1 and 2, or at a dibasic site at the C-terminal end of  
 974 domain 1, might then produce the 63-kDa N-terminal fragment and a second product containing domain  
 975 2 for which no probe currently exists. **B.** Diagram illustrating the presence and absence (red cross) of PAM,

976 the amidated peptide precursor (proGATI-NH<sub>2</sub>) and its various fragments, and the cleaved/amidated  
977 subtilisin-like endoprotease VLE1 in cilia of *minus* and *plus* vegetative and gametic cells, and in ectosomes  
978 and the soluble secretome obtained from mating gametes. PAM is present in vegetative and gametic cell  
979 cilia and is released into ectosomes but not into the secretome. In contrast, proGATI-NH<sub>2</sub> is undetectable  
980 in vegetative cilia and only appears following gametogenesis. The amidated C-terminal fragment is  
981 generated in *plus* gamete cilia and released into ectosomes and the secretome during mating; other pro-  
982 GATI products are also variably present in these samples. VLE1 is found in vegetative and *plus* gamete  
983 cilia, but not in *minus* gamete cilia. All ciliary VLE1 is proteolytically processed within the pro-domain and  
984 amidated. As VLE1 moves to ectosomes and is released into the soluble secretome, it undergoes a change  
985 in domain architecture with the catalytic S8 and C-terminal domains dissociating from the amidated N-  
986 terminal segment.

987

988

989

990

991

992

993

994

995

996

997

998

999

1000

1001

1002

1003

1004

1005

1006 **Supplemental Figures**

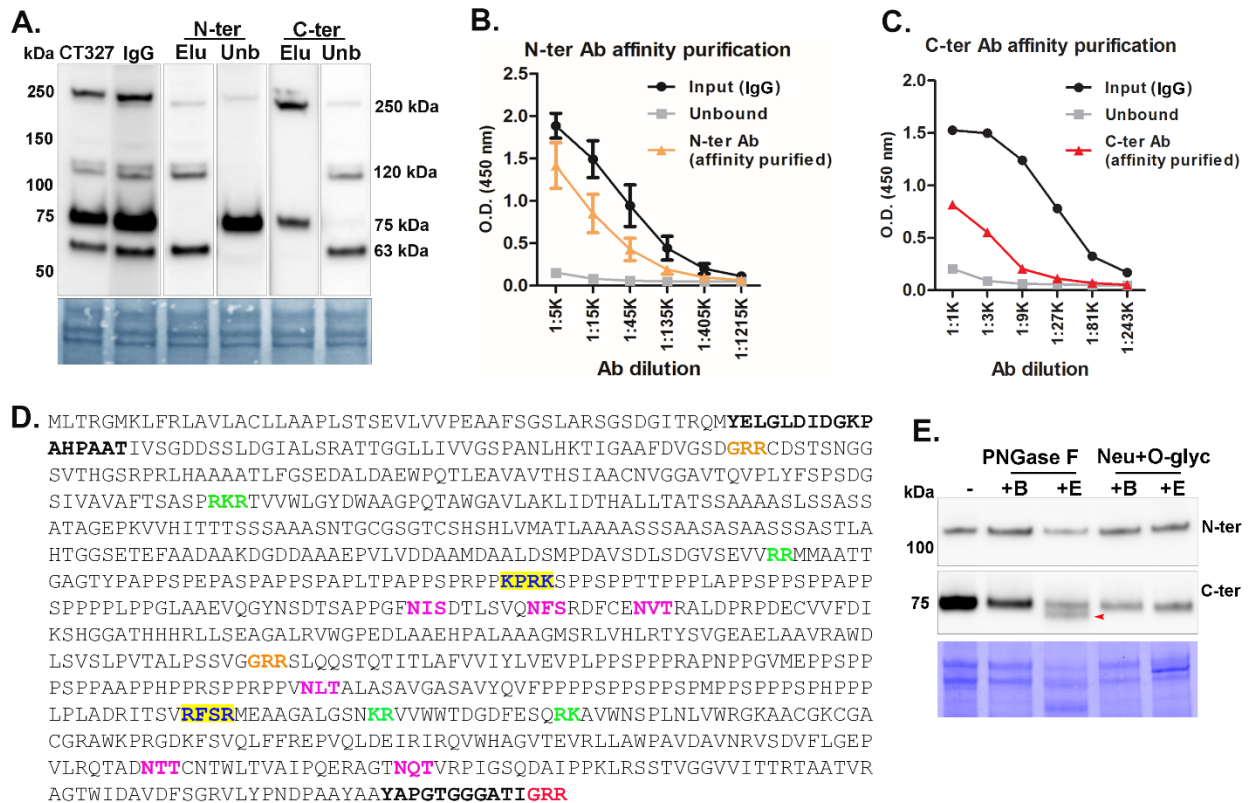

1008 **Figure S1. A.** Immunoblots showing the results of affinity-purification of N-ter and C-ter proGATI  
 1009 antibodies. Mating ectosomes (15 µg protein) were fractionated by SDS-PAGE and individual PVDF strips  
 1010 incubated with serum from rabbit CT327, an immunoglobulin-enriched fraction prepared from this serum  
 1011 (IgG) or aliquots of the material that did not bind (unbound (Unb)) or was eluted from (Elu) columns that  
 1012 contained either the N-ter or C-ter peptide linked to AffiGel. The 250-kDa, 120-kDa and 63-kDa bands  
 1013 were detected by the bound (affinity-purified) fraction of the N-ter antibody and by the unbound fraction  
 1014 of the C-ter antibody. The 250-kDa and 75-kDa bands were detected by the bound (affinity-purified)  
 1015 fraction of the C-ter antibody and by the unbound fraction of the N-ter antibody. **B** and **C.** The specificity  
 1016 and yield of the affinity-purified N-ter and C-ter antibodies was determined using a solid phase assay  
 1017 (ELISA) with the N-ter or C-ter peptide, respectively, bound to the plate. The IgG-enriched input (IgG),  
 1018 unbound, and affinity-purified N-ter and C-ter antibodies were tested. **D.** The sequence of preproGATI is  
 1019 shown. The N-ter and C-ter antigenic peptides are indicated in bold (black); the identified C-ter amidation  
 1020 site is in red and other potential cleavage/amidation sites are in orange; paired basic cleavage sites  
 1021 (green), furin-like cleavage sites (blue with yellow highlight) and six potential N-glycosylation sites (-NXS/T;  
 1022 pink) are marked. **E.** Mating ectosomes (15 µg protein) were analyzed without treatment (-) or after  
 1023 digestion with PNGase F (buffer alone, +B; with enzyme, +E), revealing a reduction in molecular mass (red  
 1024 arrow) of the 75-kDa C-ter product but not the 120-kDa N-ter proGATI product. Digestion with  
 1025 neuraminidase and O-glycosidase (buffer alone, +B; with enzyme, +E) had no effect. The results were  
 1026 replicated in independent experiments.



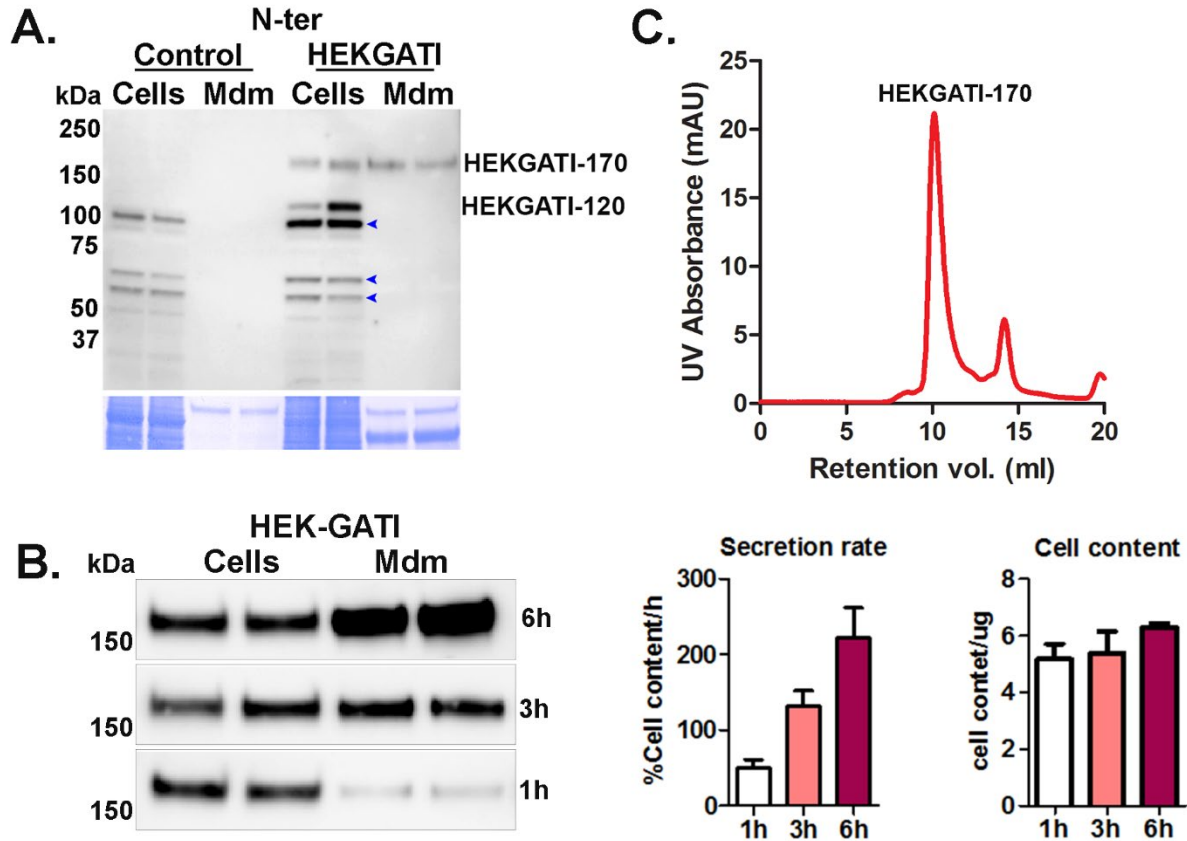

1028 **Figure S2. A.** Cell extracts (Cells) and the spent medium (Mdm) from HEK-preproGATI cells and Control  
1029 cells were probed with the N-ter proGATI antibody. HEK-proGATI protein (HEK-GATI-170) was detected in  
1030 both cell lysates and spent media, while HEK-GATI-120 was only present in cell extracts. Non-specific  
1031 bands (present in Control) are marked with blue arrowheads. Equal amounts of cell lysate (20  $\mu$ g, 10% of  
1032 total) and spent medium (1% of total from an 18 h collection) were analyzed. **B.** HEK-GATI cells were  
1033 incubated in serum-free medium for 1, 3 and 6 h time periods; cell lysates and spent media were analyzed  
1034 with the C-ter antibody. The HEK-GATI cells secrete the 170-kDa product rapidly; its secretion rate  
1035 increased over a period of 6 hours (left graph), while the cell content remained constant (right graph). **C.**  
1036 Gel filtration chromatogram of purified HEK-proGATI protein. The relative absorbance, measured at 280  
1037 nm (red line) shows the peak of purified HEK-proGATI protein.

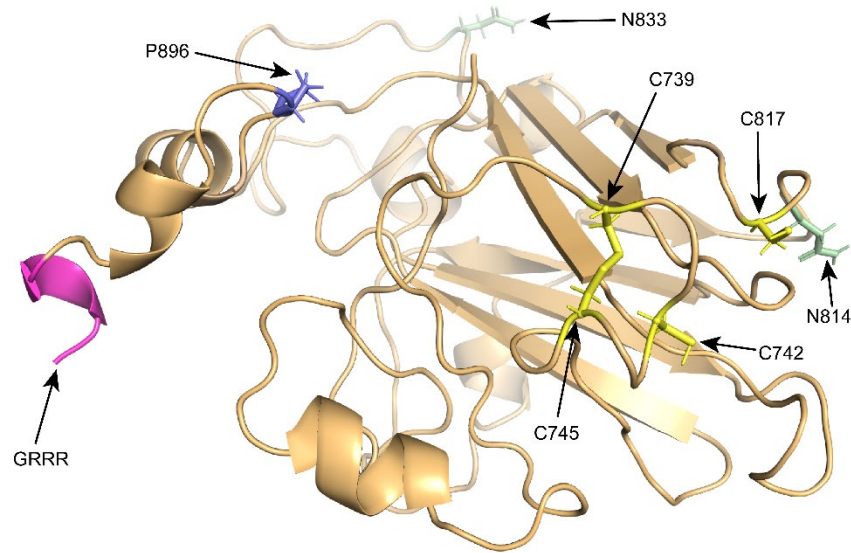

1039 **Figure S3.** The detailed structural model for domain 3 of proGATI is shown. This domain forms an  
 1040 antiparallel  $\beta$  sandwich. The post-translationally modified residues identified in purified HEK-proGATI  
 1041 protein are all exposed on the surface; two deamidated Asn residues (marked in green), one HyP residue  
 1042 (purple) and the C-terminal amidation site (pink) are indicated. This domain contains four Cys residues  
 1043 (indicated in yellow); two ( $C^{739}$  and  $C^{745}$ ) are predicted to form a disulfide bond, while two others ( $C^{742}$  and  
 1044  $C^{817}$ ), although in relatively close proximity, are not.

1045

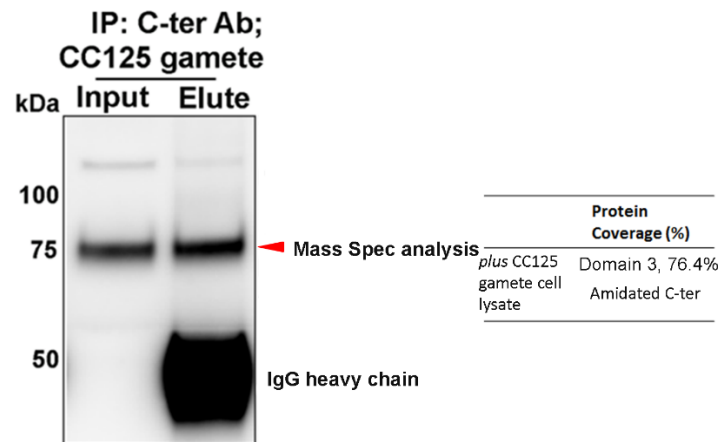

1047 **Figure S4.** Affinity-purified C-ter antibody was used to immunoprecipitate cross-reactive material from  
 1048 *plus* gamete cell lysates. The 75-kDa fragment (red arrowhead) was analyzed by mass spectrometry. Only  
 1049 peptides from the C-terminal region of proGATI were identified; all were to the C-terminal side of the  
 1050 furin-like cleavage site illustrated in Fig. 1E. The C-terminal peptide (VLYPNDPAAYAAAYAPGTGGGATI-NH<sub>2</sub>)  
 1051 identified in *plus* gametes was  $\alpha$ -amidated.

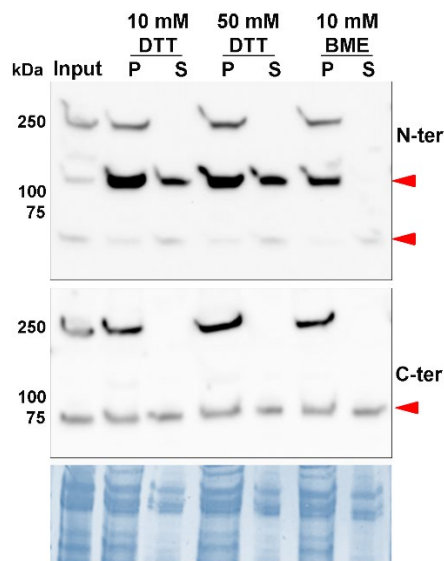

1053 **Figure S5.** Isolated ectosomes (input) were washed with buffer containing either 10 or 50 mM  
 1054 dithiothreitol (DTT) or 10 mM  $\beta$ -mercaptoethanol (BME). Although the 120-kDa N-terminal product was  
 1055 released into the supernatant by DTT, it remained ectosome-associated in the presence of  $\beta$ -  
 1056 mercaptoethanol. No differential effects of these reagents were observed for the 75-kDa C-terminal  
 1057 fragment that is released from ectosomes by buffer treatment alone (see Fig. 6C).

1058

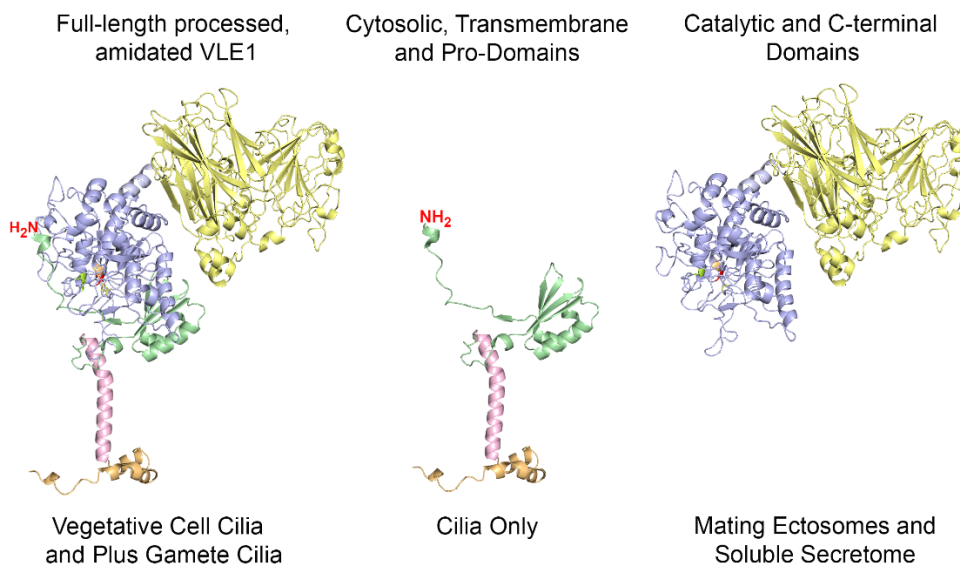

1060 **Figure S6.** Changes in VLE1 domain organization occur during trafficking of VLE1 from cilia to ectosomes  
 1061 and the soluble secretome. When on the ciliary membrane of both vegetative cells and plus gametes,  
 1062 full-length VLE1 that has been cleaved at the diarginine site and subsequently amidated is present.  
 1063 However, as VLE1 moves to ectosomes and is released into the secretome, the catalytic S8 and C-terminal  
 1064 domains dissociate from the pro-domain which is not present in these fractions; the N-terminal/pro-  
 1065 domain region is presumably either retained on the ciliary membrane or trafficked back to the cell body  
 1066 for degradation.

## 1067 Supplemental Data

### CILIA SAMPLES

|                    |              |               |                  | Normalized total spectra |        |        |    |    |    |        |        |        |        |        |         |
|--------------------|--------------|---------------|------------------|--------------------------|--------|--------|----|----|----|--------|--------|--------|--------|--------|---------|
| Accession Number   | Alternate ID | Description   | Molecular Weight | 1A                       | 1B     | 1C     | 2A | 2B | 2C | 3A     | 3B     | 3C     | 4A     | 4B     | 4C      |
| Cre01_g049950.t1.1 | SPO_VLE1     | Subtilisin/sp | 123 kDa          | 12.413                   | 12.129 | 12.325 | 0  | 0  | 0  | 0      | 0      | 0      | 0      | 0      | 0       |
| Cre17_g735450.t1.1 | SUB14        | PROPROTEI     | 168 kDa          | 0                        | 0      | 0      | 0  | 0  | 0  | 5.8658 | 5.6715 | 6.7454 | 1.8382 | 1.8411 | 0.92327 |

  

| Sample | Veg/Gamete | M&M/Axo | Mating Type | 5A     | 5B     | 5C     | 6A | 6B     | 6C | 7A     | 7B     | 7C     | 8A | 8B | 8C |
|--------|------------|---------|-------------|--------|--------|--------|----|--------|----|--------|--------|--------|----|----|----|
| 1      | Veg        | M&M     | minus       | 30.669 | 31.791 | 32.068 | 0  | 1.8689 | 0  | 14.994 | 11.593 | 8.3772 | 0  | 0  | 0  |
| 2      | Veg        | Axo     | minus       | 0      | 0      | 0      | 0  | 0      | 0  | 0      | 0      | 0      | 0  | 0  | 0  |
| 3      | Gam        | M&M     | minus       |        |        |        |    |        |    |        |        |        |    |    |    |
| 4      | Gam        | Axo     | minus       |        |        |        |    |        |    |        |        |        |    |    |    |
| 5      | Veg        | M&M     | plus        |        |        |        |    |        |    |        |        |        |    |    |    |
| 6      | Veg        | Axo     | plus        |        |        |        |    |        |    |        |        |        |    |    |    |
| 7      | Gam        | M&M     | plus        |        |        |        |    |        |    |        |        |        |    |    |    |
| 8      | Gam        | Axo     | plus        |        |        |        |    |        |    |        |        |        |    |    |    |

### MATING ECYSOMES

#### Normalized to average spectral count (58,988)

| Accession Number   | Phytozome Annotation                   | Alternate ID | Molecular Mass | Sample EA | Sample EB | Sample EC | Sample ED | Sample EE | Sample EF | Total spectral counts (Mean) | Relative standard deviation (SD/ Mean) |
|--------------------|----------------------------------------|--------------|----------------|-----------|-----------|-----------|-----------|-----------|-----------|------------------------------|----------------------------------------|
| Cre01_g049950.t1.1 | PROPROTEIN CONVERTASE SUBTILISIN/KEXIN | VLE1         | 123kDa         | 65.8      | 45.0      | 45.0      | 56.7      | 41.3      | 46.3      | 50.0                         | 0.2                                    |
| Cre17_g735450.t1.1 | PROPROTEIN CONVERTASE SUBTILISIN/KEXIN | SUB14        | 168kDa         | 8.4       | 3.0       | 19.8      | 25.7      | 25.3      | 26.4      | 18.1                         | 0.6                                    |

From Luxmi et al., 2019

### SOLUBLE MATING SECRETOME

| Accession Number   | Molecular Mass | Sample A  | Sample B | Sample C | Sample D | Sample E | Sample F | norm'd average spectral | SEM/ average spectral |
|--------------------|----------------|-----------|----------|----------|----------|----------|----------|-------------------------|-----------------------|
| Cre01_g049950.t1.1 | 123 kDa        | 16        | 7        | 17       | 2        | 1        | 0        | 6.107183                | 0.467422              |
| Cre17_g735450      | 168 kDa        | NOT FOUND |          |          |          |          |          |                         |                       |

From Luxmi et al., 2018

1069 **Supplemental Data File 1.** Mass spectral data (normalized total spectral counts) for VLE1 and SUB14 in  
 1070 vegetative and gametic cilia of both mating types. Cilia were fractionated into a detergent-soluble  
 1071 membrane plus matrix fraction and an axonemal fraction. All samples were analyzed in triplicate. Also  
 1072 shown are the normalized average spectral counts for the presence of these two proteins in mating  
 1073 ectosomes (data from (Luxmi et al., 2019)) and soluble mating secretome (data from (Luxmi et al., 2018))  
 1074 (\*.xlsx format).

1075

### 1076 Source Data File

1077 This file contains annotated uncropped gel and blot images used to prepare Figs. 1B, 1C, 1D, 2A, 2B, 2D,  
 1078 2E, 3A, 4A, 5B, 5D, 5E, 6A, 6C, S1A, S1E, S2A, S2B, S4, and S5. (\*.docx format).

1079
